# Supplementary material for: Synthesis of (Het)aryl 2-(2-hydroxyaryl)cyclopropyl Ketones
Source: MDPI journal article supplement (doi:10.3390/molecules25235748), 2020-12-05

# Synthesis of (Het)aryl 2-(2-Hydroxyaryl)Cyclopropyl Ketones

Alexander A. Fadeev <sup>1,2</sup>, Alexey O. Chagarovskiy <sup>3,4</sup>, Anton S. Makarov <sup>2</sup>, Irina I. Levina <sup>5</sup>,

Olga A. Ivanova <sup>3,6</sup>, Maxim G. Uchuskin <sup>2,\*</sup> and Igor V. Trushkov <sup>3,4,\*</sup>

<sup>1</sup> Department of Organic Chemistry, Faculty of Science, Charles University, Hlavova 8, 12800 Prague 2, Czech Republic; [fadeev@fadeeva.natur.cuni.cz](mailto:fadeev@fadeeva.natur.cuni.cz)

<sup>2</sup> Department of Chemistry, Perm State University, Bukireva 15, Perm 614990, Russian Federation; [antony.s.makarov@psu.ru](mailto:antony.s.makarov@psu.ru)

<sup>3</sup> N. D. Zelinsky Institute of Organic Chemistry, Leninsky pr. 47, Moscow 119991, Russian Federation

<sup>4</sup> Dmitry Rogachev National Medical Research Center of Pediatric Hematology, Oncology and Immunology, Samory Mashela 1, Moscow 117997, Russian Federation; [alex.chagarovskiy@gmail.com](mailto:alex.chagarovskiy@gmail.com)

<sup>5</sup> N.M. Emanuel Institute of Biochemical Physics Russian Academy of Sciences, Kosygina 4, Moscow 117198, Russian Federation; [iilevina@inbox.ru](mailto:iilevina@inbox.ru)

<sup>6</sup> Department of Chemistry, M. V. Lomonosov Moscow State University, Leninskie gory 1-3, Moscow 119991, Russian Federation; [iv@kinet.chem.msu.ru](mailto:iv@kinet.chem.msu.ru)

\* Correspondence: [mu@psu.ru](mailto:mu@psu.ru) (M.G.U.); [itrushkov@mail.ru](mailto:itrushkov@mail.ru) (I.V.T.); Tel.: +7-916-645-9951 (I.V.T.)

## SUPPORTING INFORMATION

### Copies of NMR spectra

**(E)-3-(5-Fluoro-2-hydroxyphenyl)-1-(4-methoxyphenyl)prop-2-en-1-one (1d)**

<sup>1</sup>H NMR (500 MHz, DMSO-*d*<sub>6</sub>)

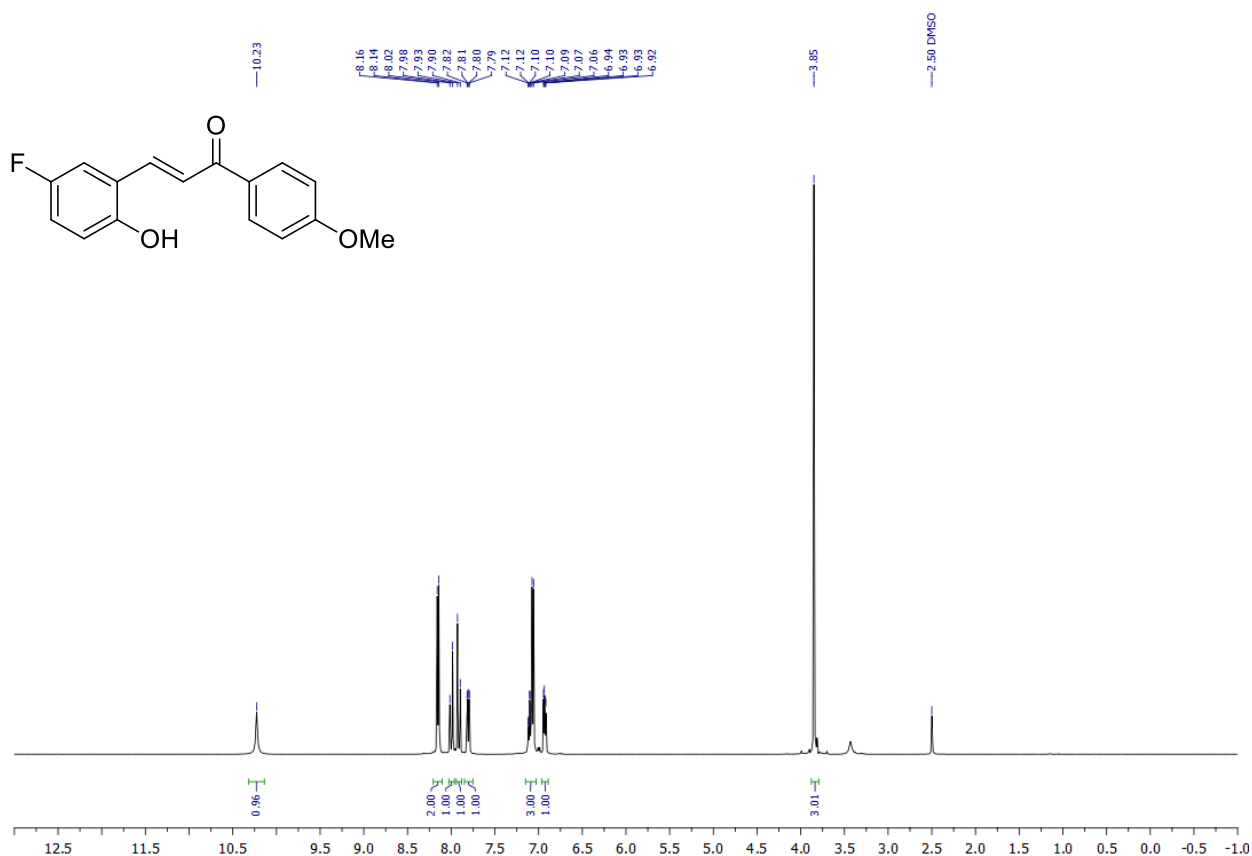

<sup>13</sup>C NMR (126 MHz, DMSO-*d*<sub>6</sub>)

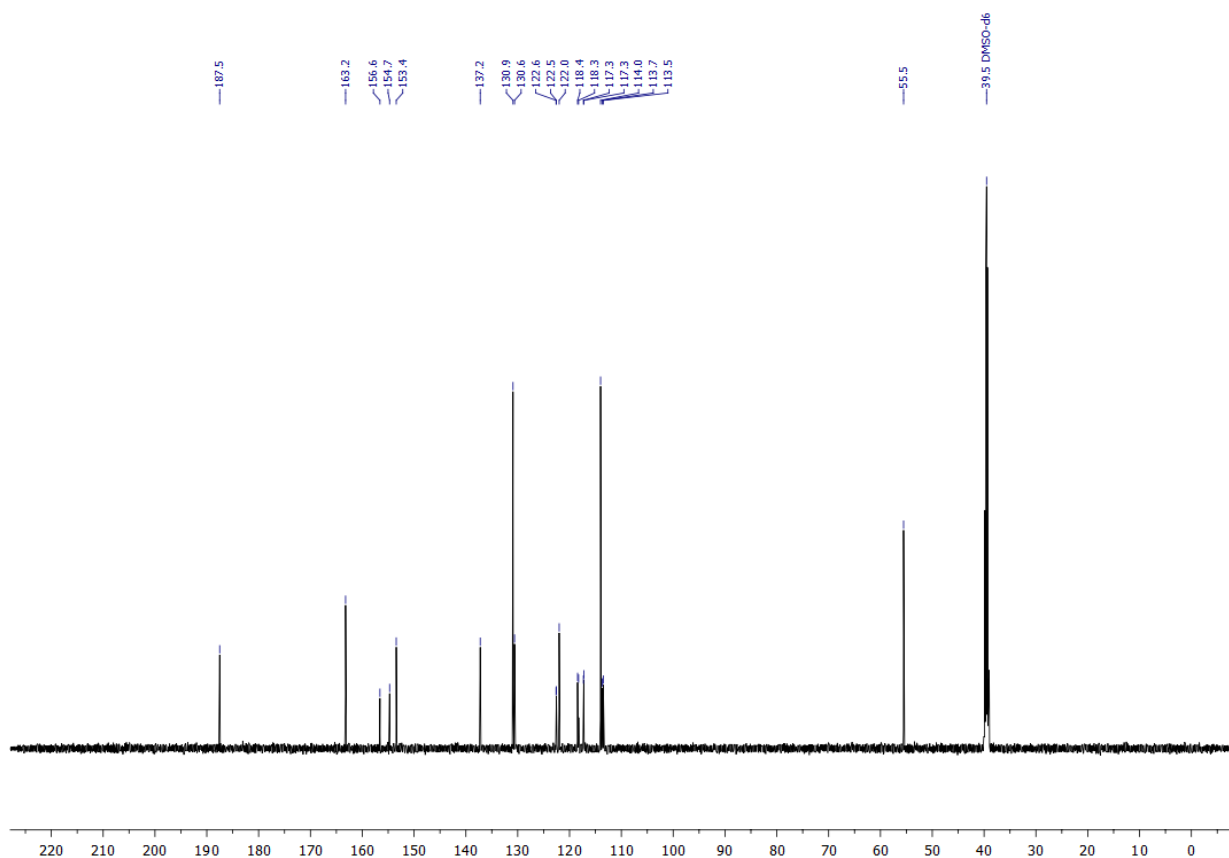

**(E)-3-(5-Fluoro-2-hydroxyphenyl)-1-(4-methoxyphenyl)prop-2-en-1-one (1d)**

<sup>19</sup>F NMR (471 MHz, DMSO-*d*<sub>6</sub>)

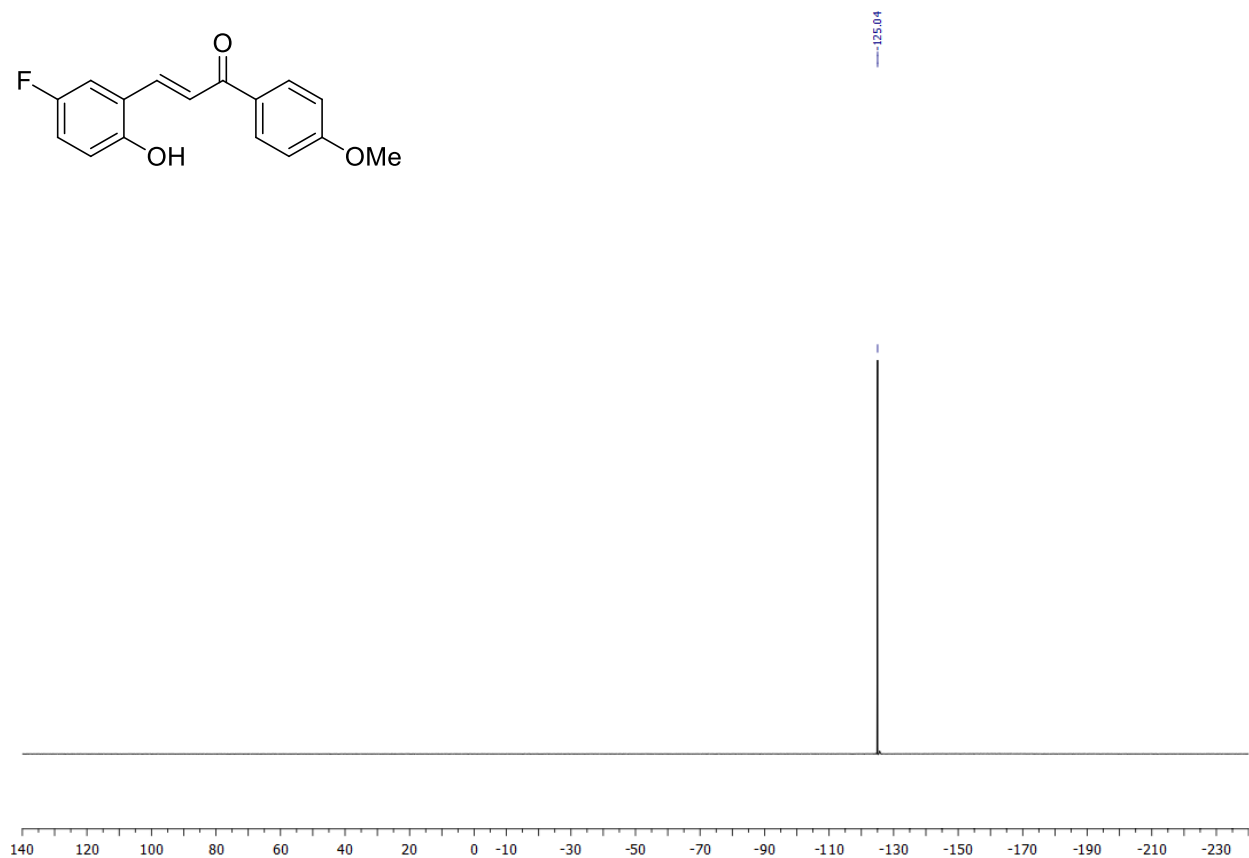

**(E)-3-(2-Hydroxy-5-nitrophenyl)-1-(4-methoxyphenyl)prop-2-en-1-one (1f)**

<sup>1</sup>H NMR (500 MHz, DMSO-*d*<sub>6</sub>)

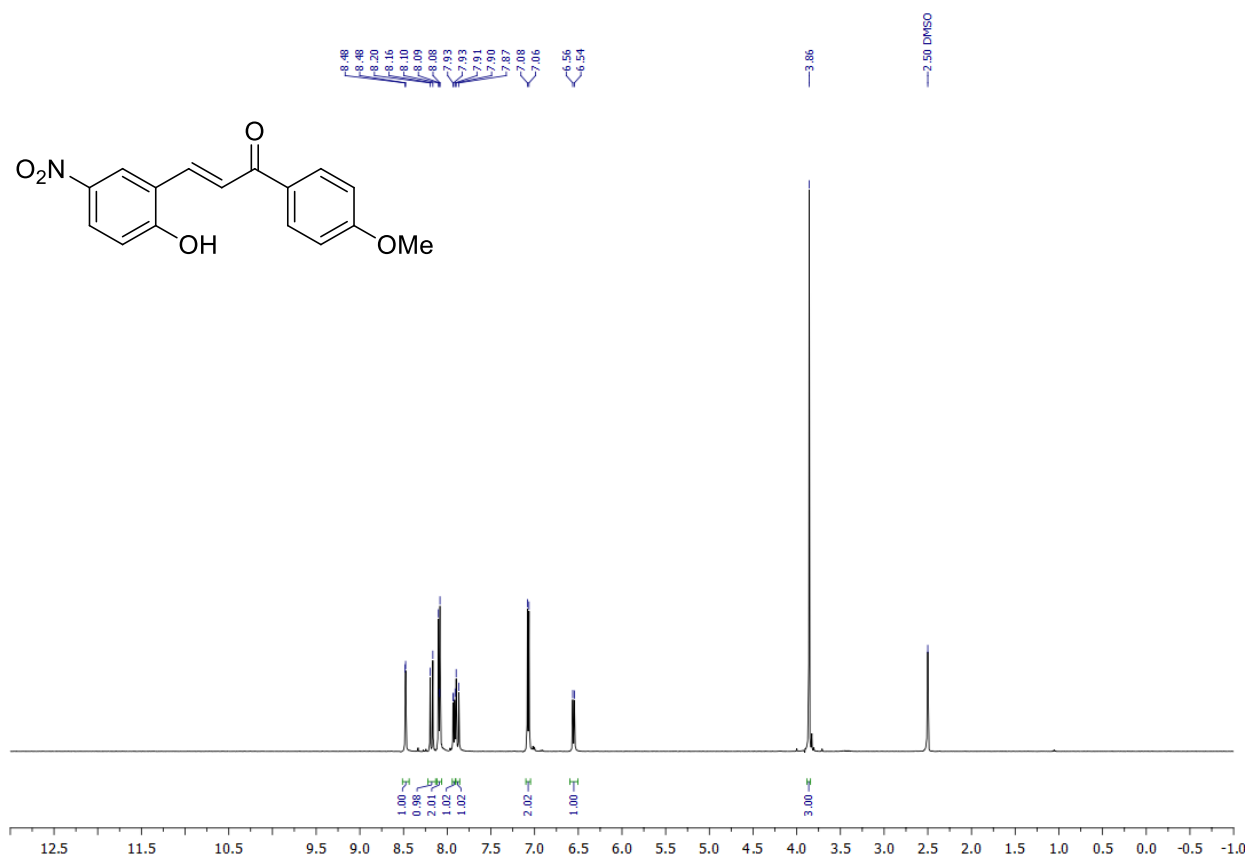

<sup>13</sup>C NMR (126 MHz, DMSO-*d*<sub>6</sub>)

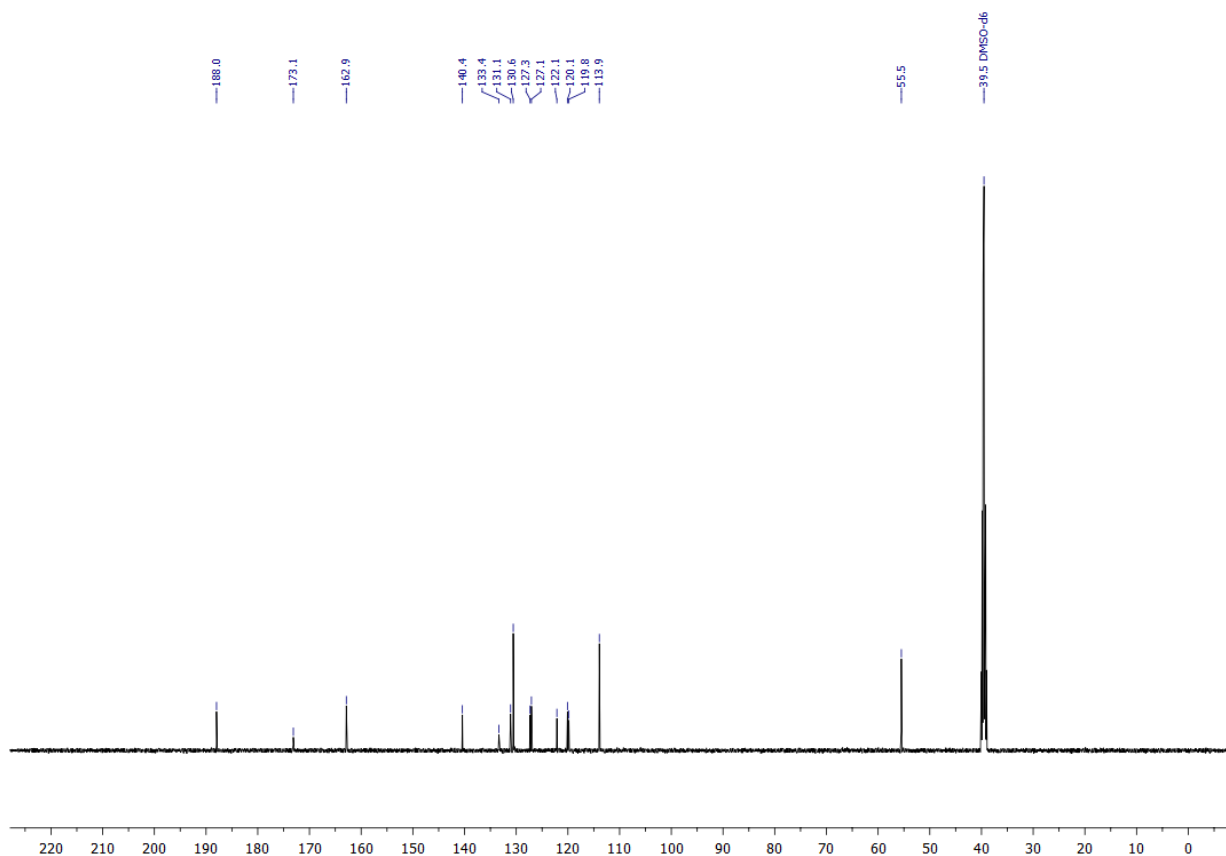

**(E)-3-(5-Fluoro-2-hydroxyphenyl)-1-phenylprop-2-en-1-one (1g)**

<sup>1</sup>H NMR (500 MHz, DMSO-*d*<sub>6</sub>)

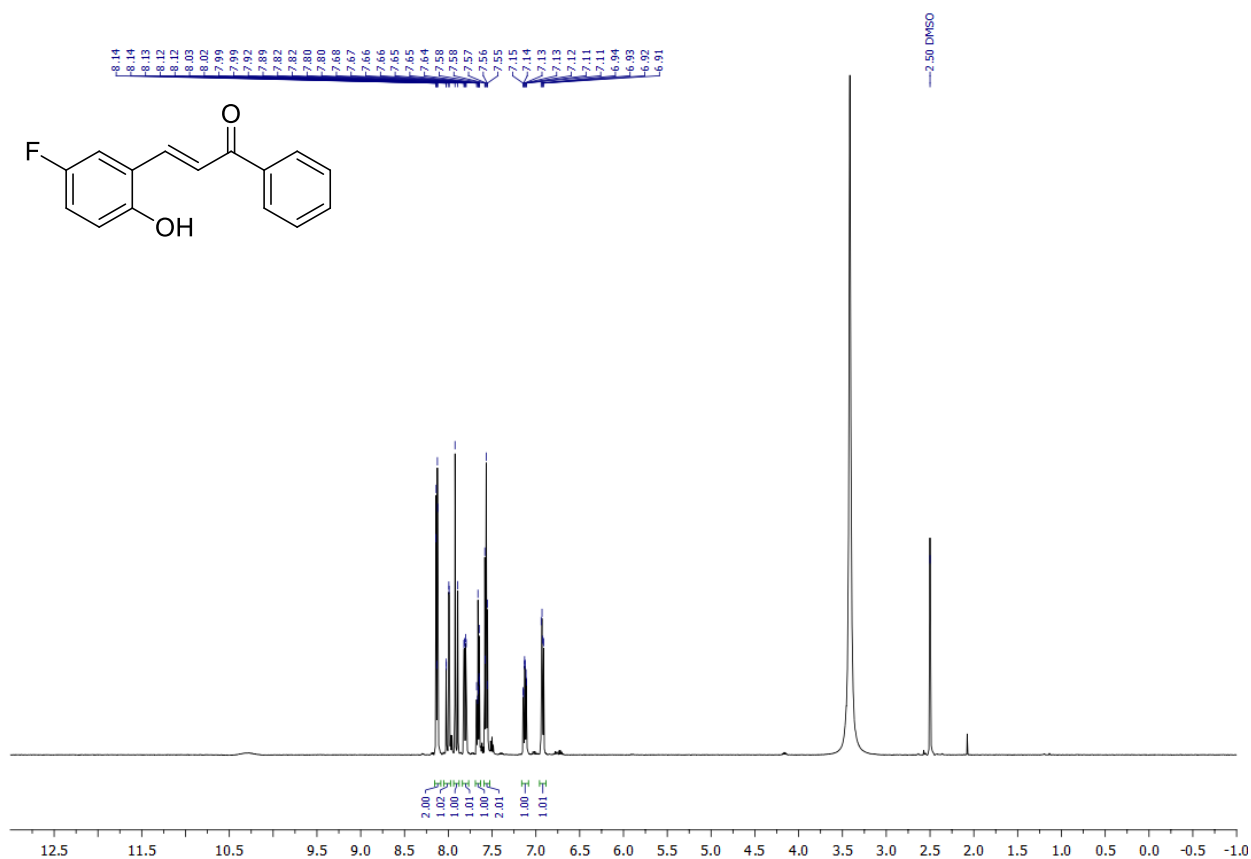

<sup>13</sup>C NMR (126 MHz, DMSO-*d*<sub>6</sub>)

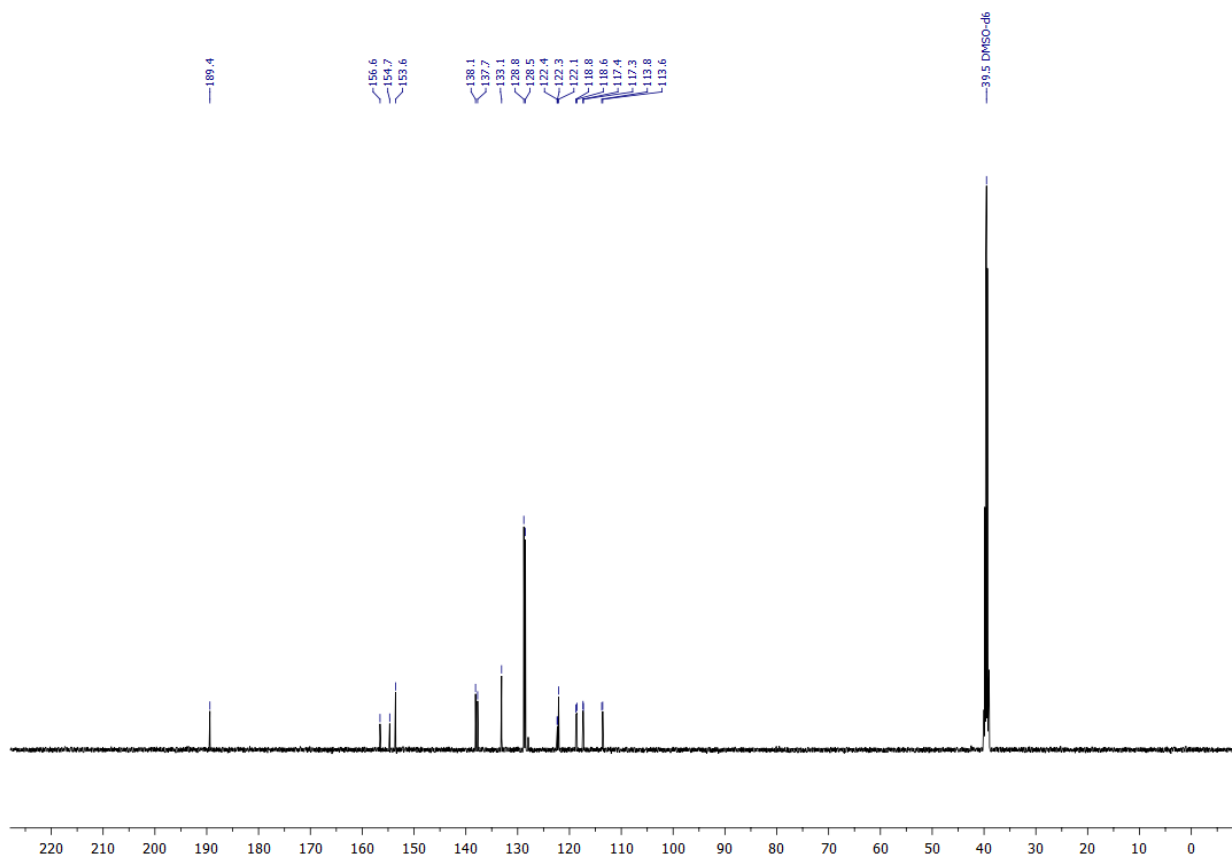

**(E)-3-(5-Fluoro-2-hydroxyphenyl)-1-phenylprop-2-en-1-one (1g)**

<sup>19</sup>F NMR (471 MHz, DMSO-*d*<sub>6</sub>)

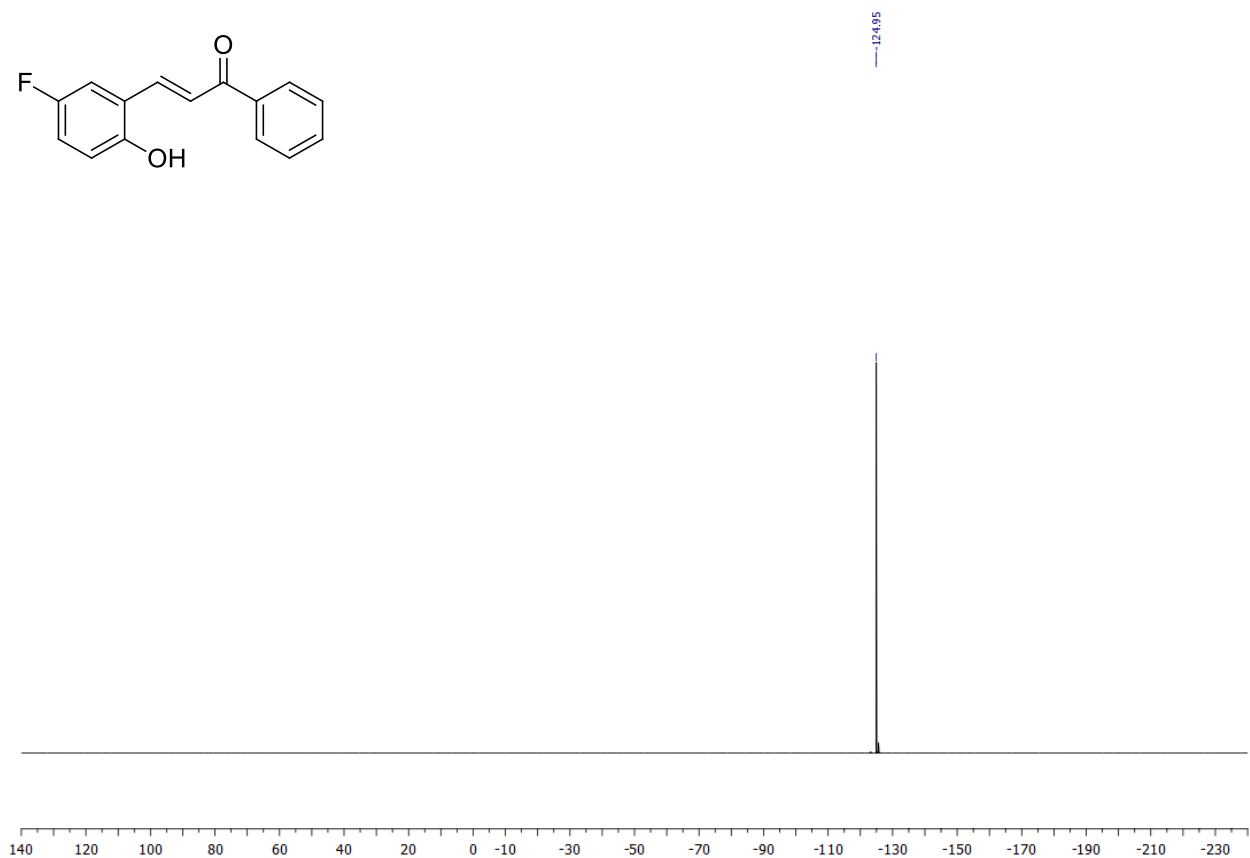

**(E)-3-(5-Fluoro-2-hydroxyphenyl)-1-(2-thienyl)prop-2-en-1-one (1j)**

$^1\text{H}$  NMR (500 MHz,  $\text{DMSO}-d_6$ )

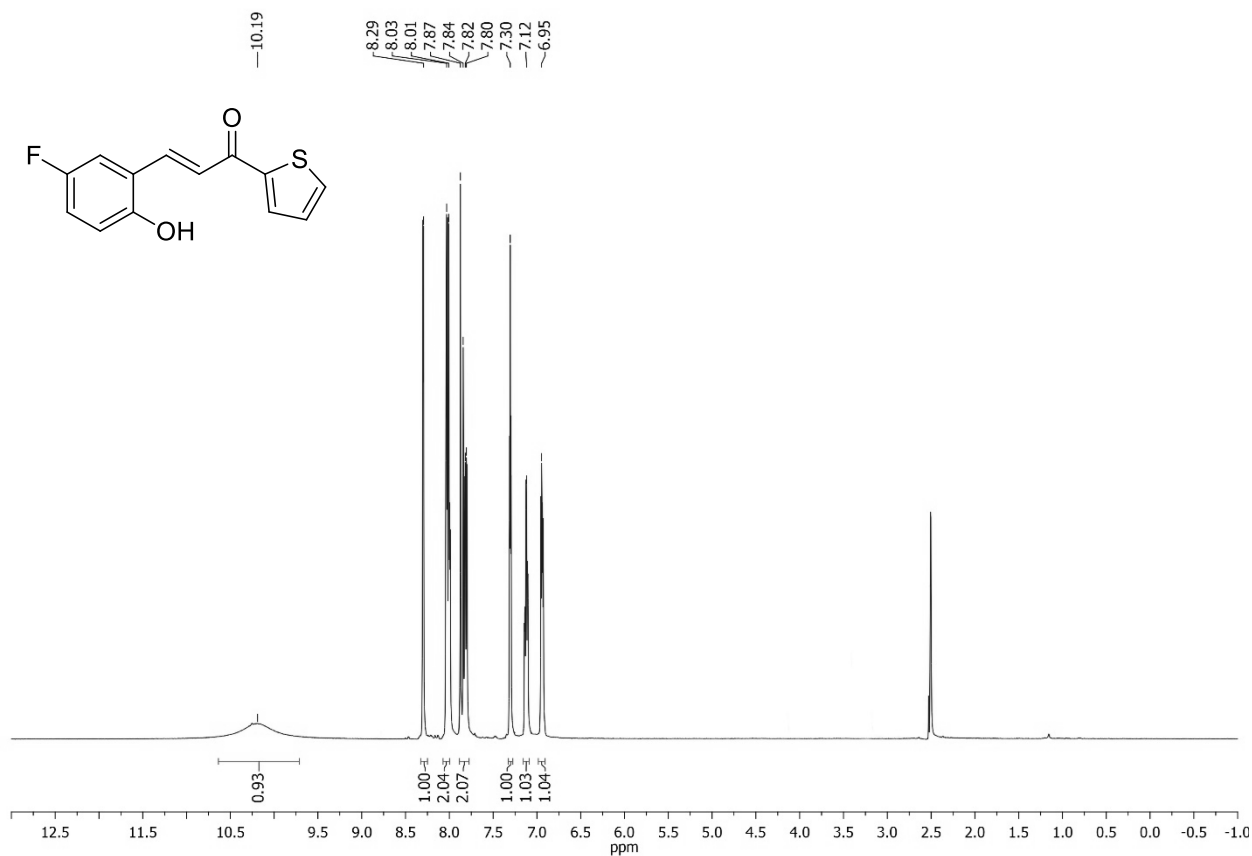

$^{13}\text{C}$  NMR (126 MHz,  $\text{DMSO}-d_6$ )

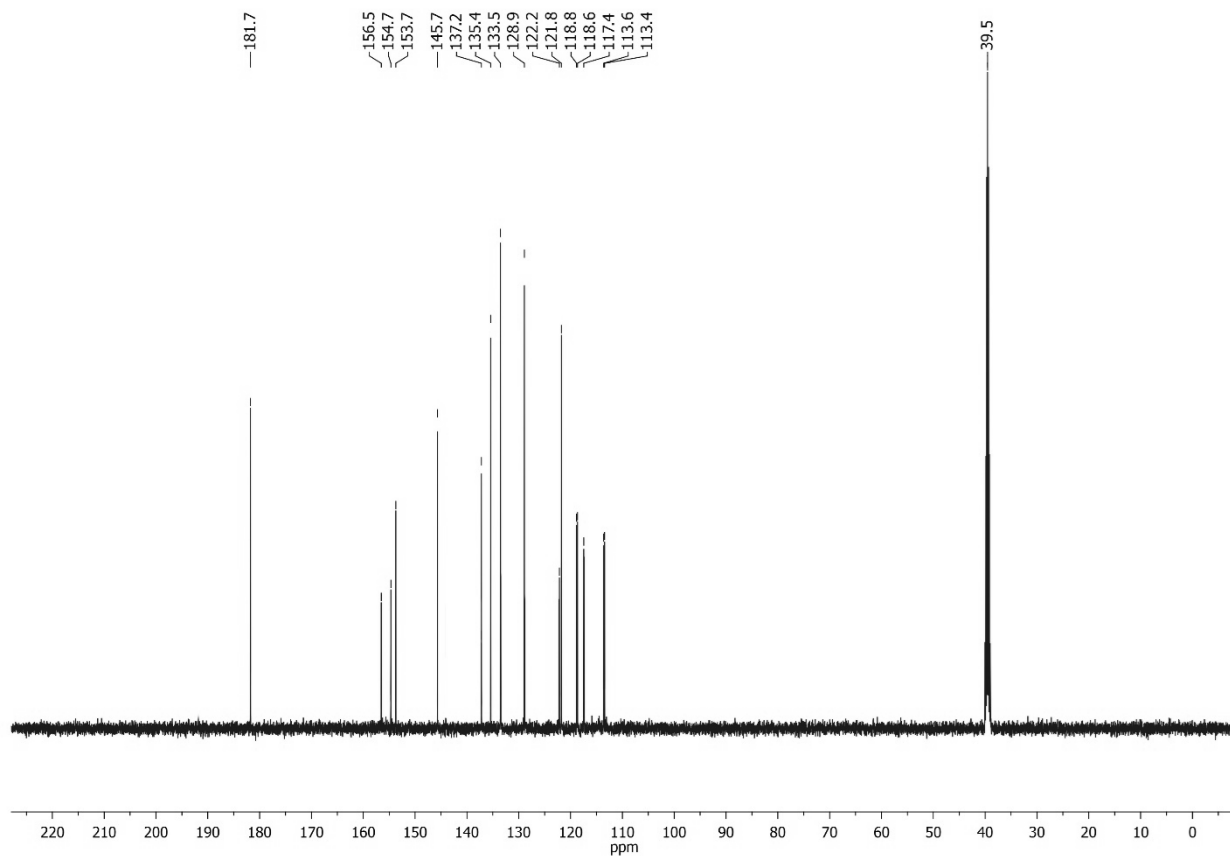

**(E)-3-(5-Fluoro-2-hydroxyphenyl)-1-(2-thienyl)prop-2-en-1-one (1j)**

<sup>19</sup>F NMR (471 MHz, DMSO-*d*<sub>6</sub>)

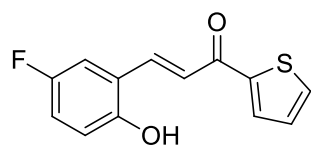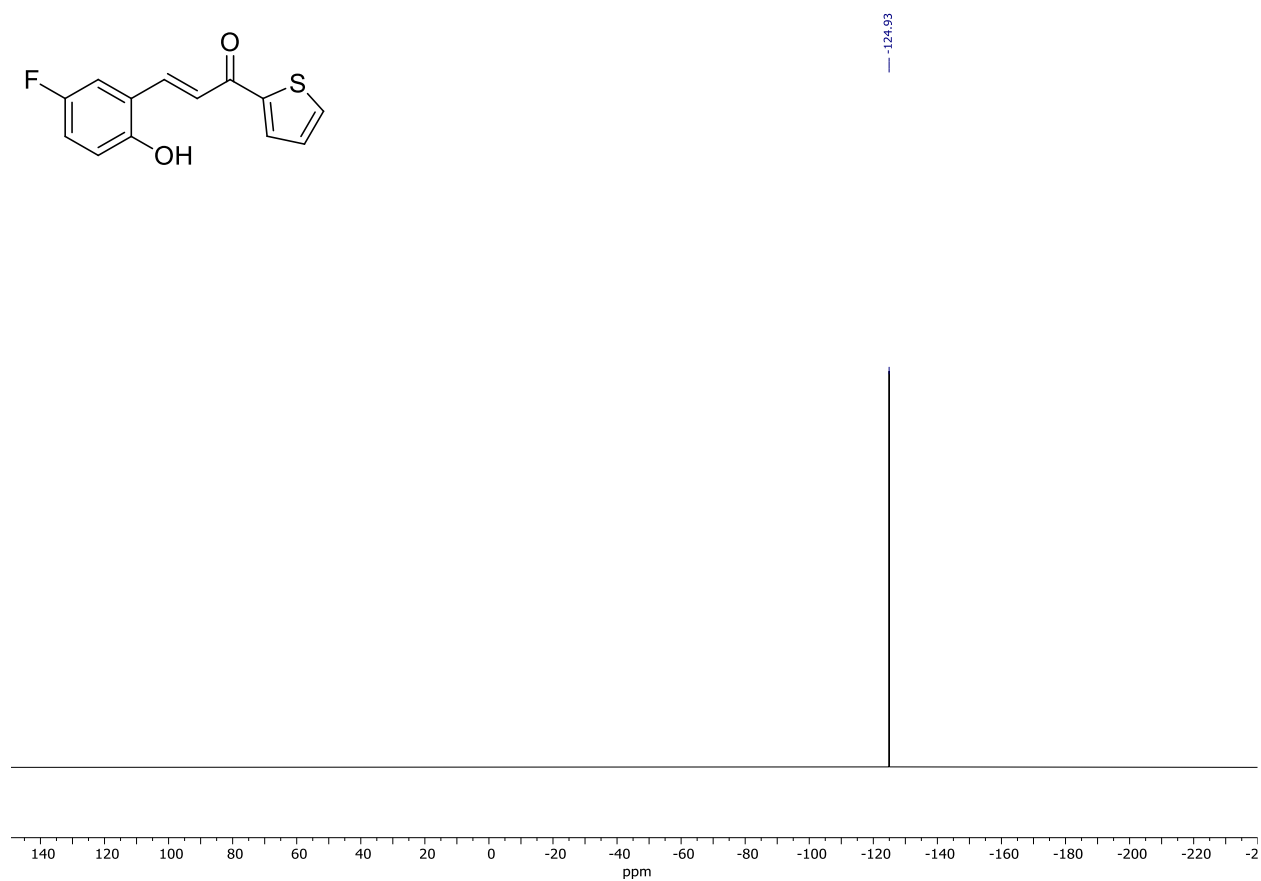



**(E)-3-(5-Chloro-2-hydroxyphenyl)-1-(2-thienyl)prop-2-en-1-one (1k)**

$^1\text{H}$  NMR (500 MHz,  $\text{DMSO}-d_6$ )

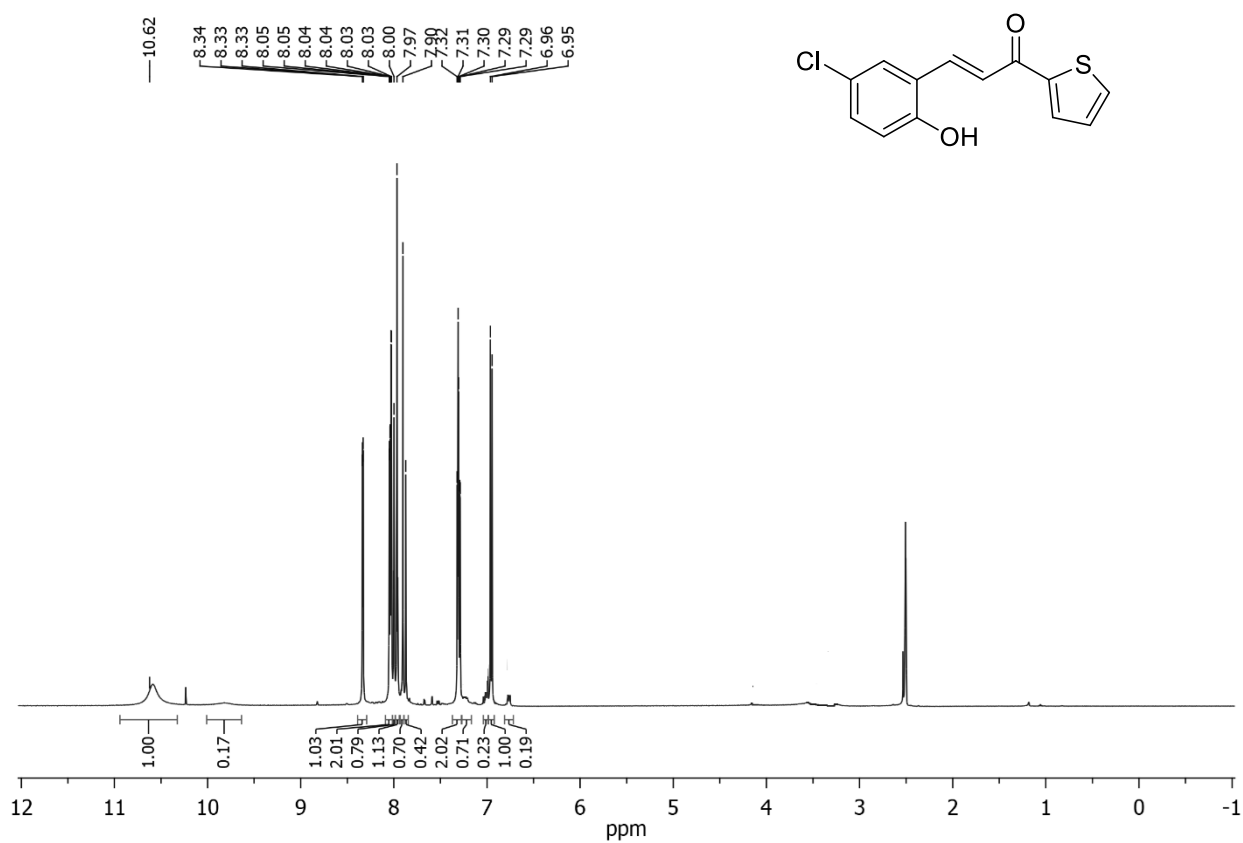

$^{13}\text{C}$  NMR (126 MHz,  $\text{DMSO}-d_6$ )

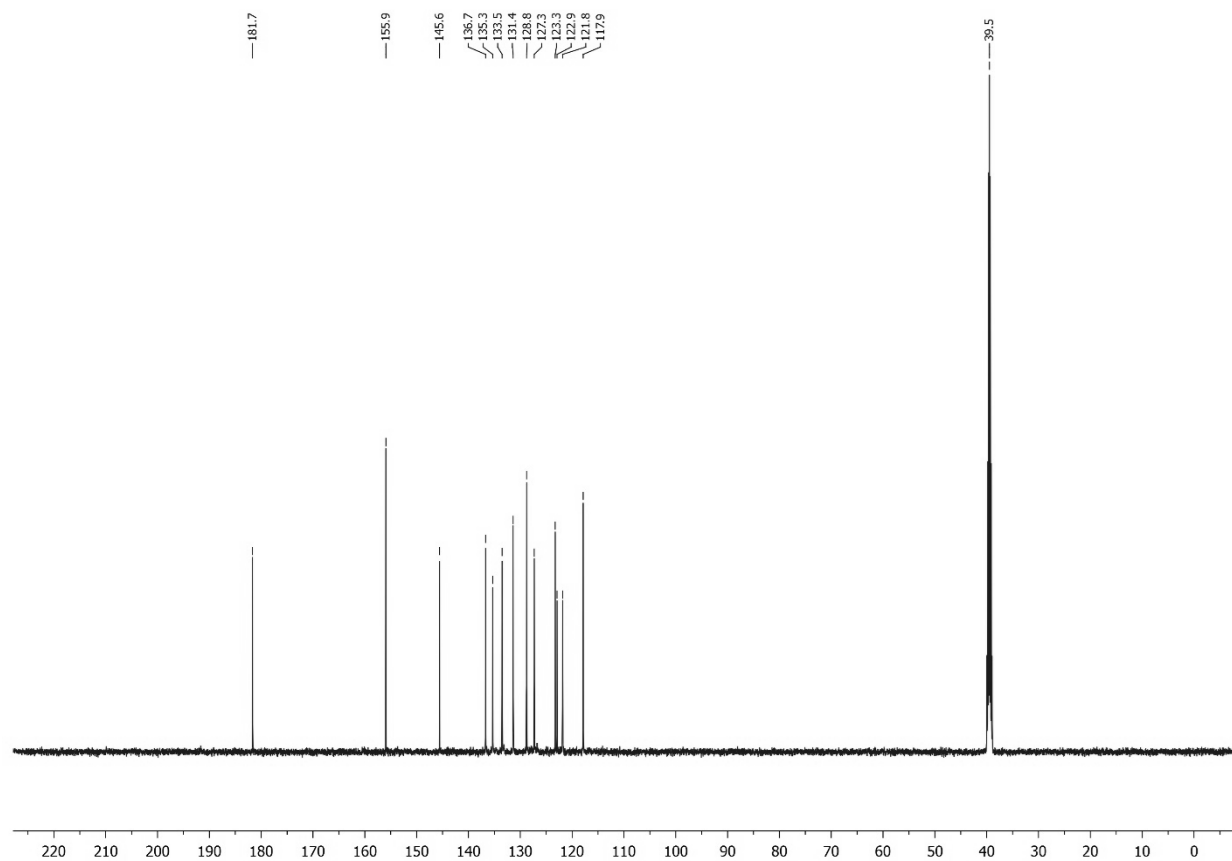

**(E)-3-(5-Bromo-2-hydroxyphenyl)-1-(2-thienyl)prop-2-en-1-one (11)**

<sup>1</sup>H NMR (500 MHz, DMSO-*d*<sub>6</sub>)

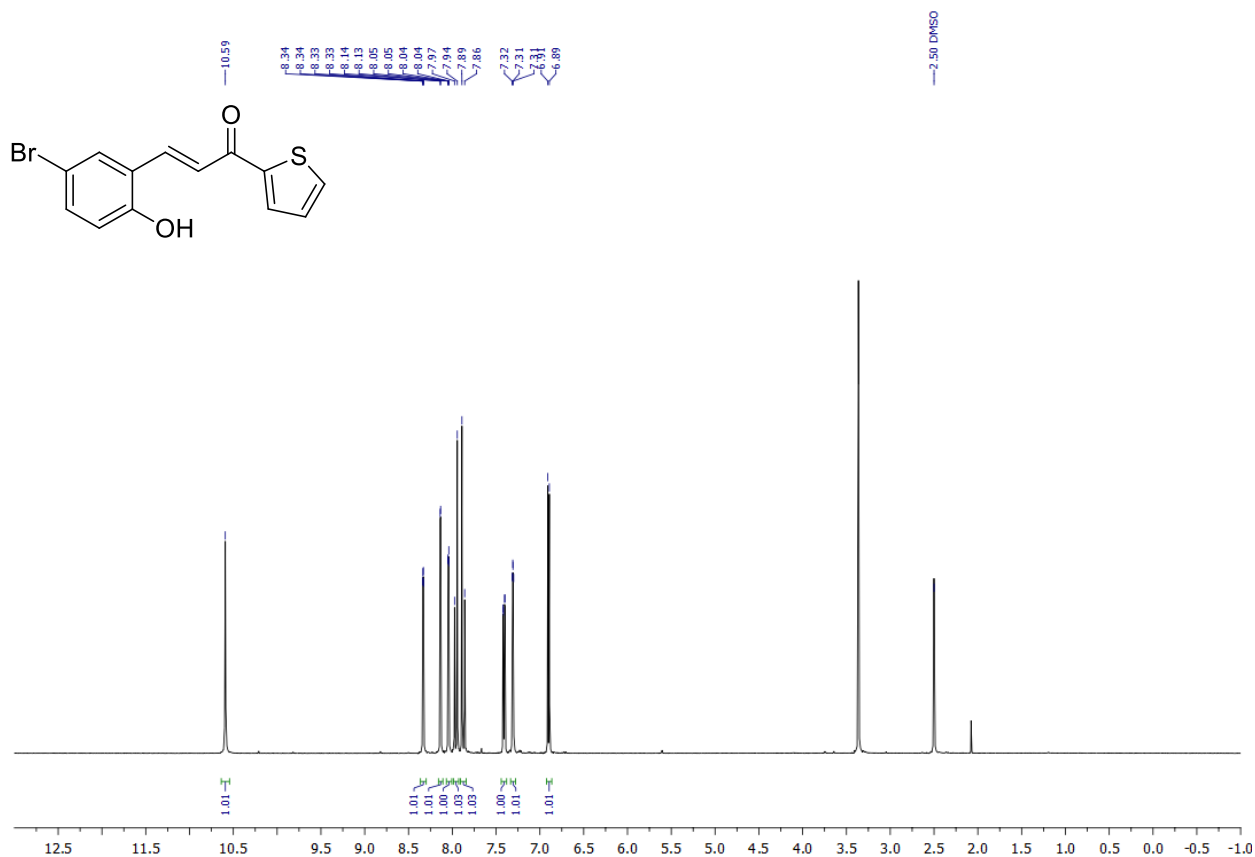

<sup>13</sup>C NMR (126 MHz, DMSO-*d*<sub>6</sub>)

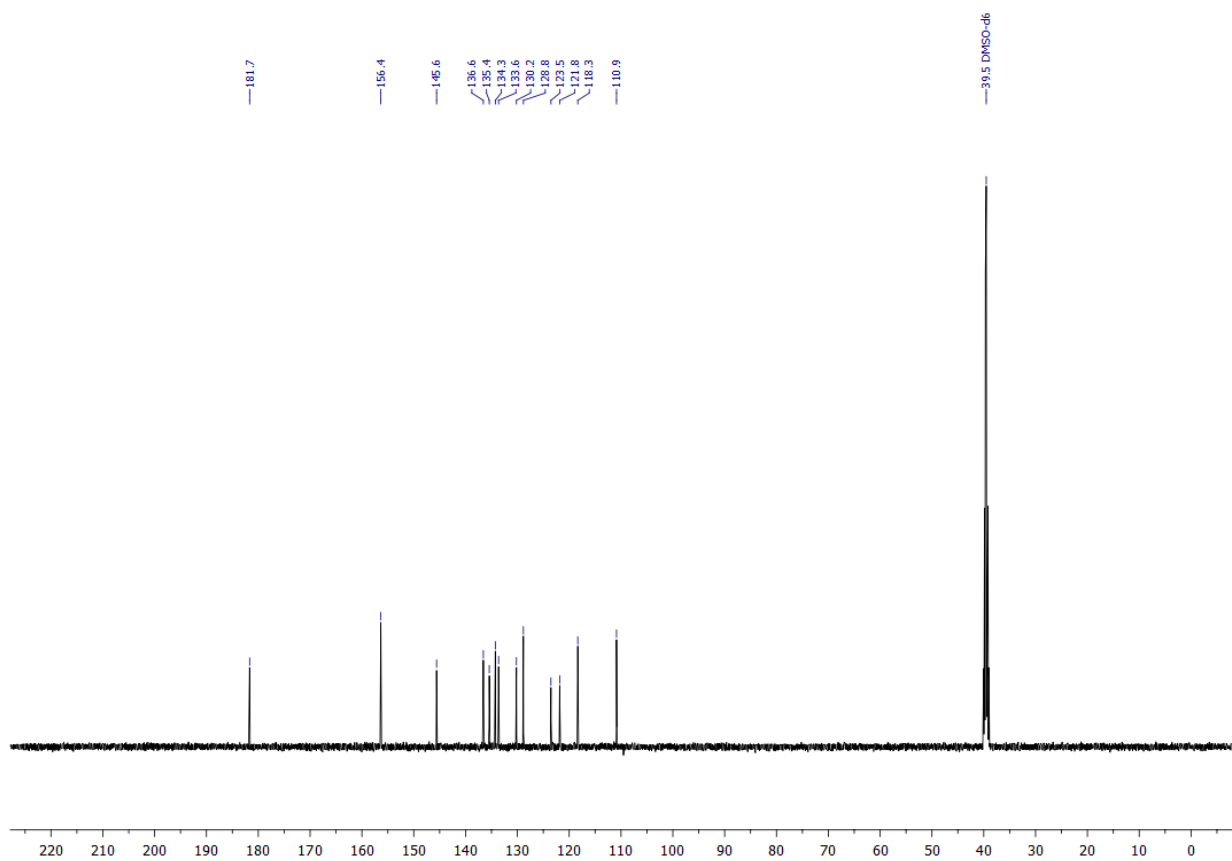

**(E)-3-(2-Hydroxy-5-nitrophenyl)-1-(2-thienyl)prop-2-en-1-one (1m)**

<sup>1</sup>H NMR (500 MHz, DMSO-*d*<sub>6</sub>)

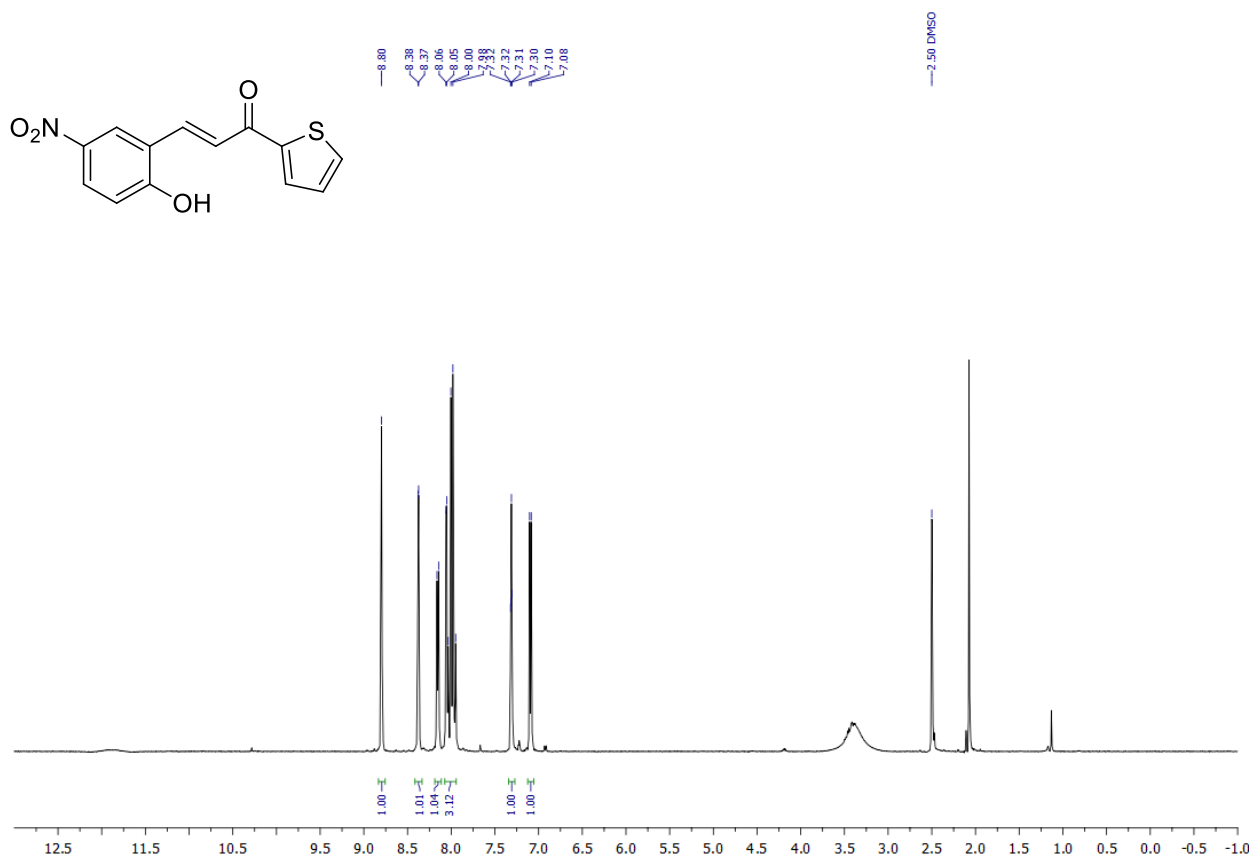

<sup>13</sup>C NMR (126 MHz, DMSO-*d*<sub>6</sub>)

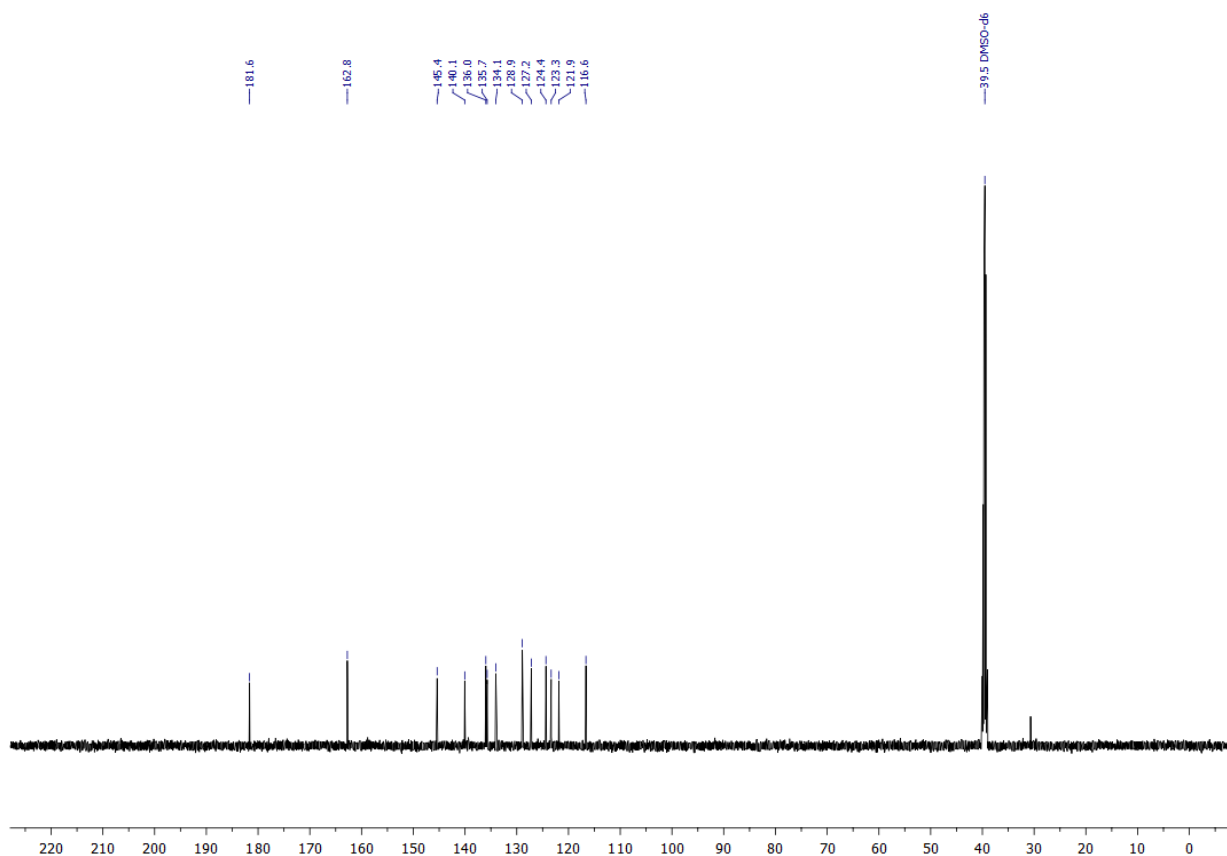

**(E)-3-(3-Ethoxy-2-hydroxyphenyl)-1-phenylprop-2-en-1-one (1o)**

<sup>1</sup>H NMR (500 MHz, DMSO-*d*<sub>6</sub>)

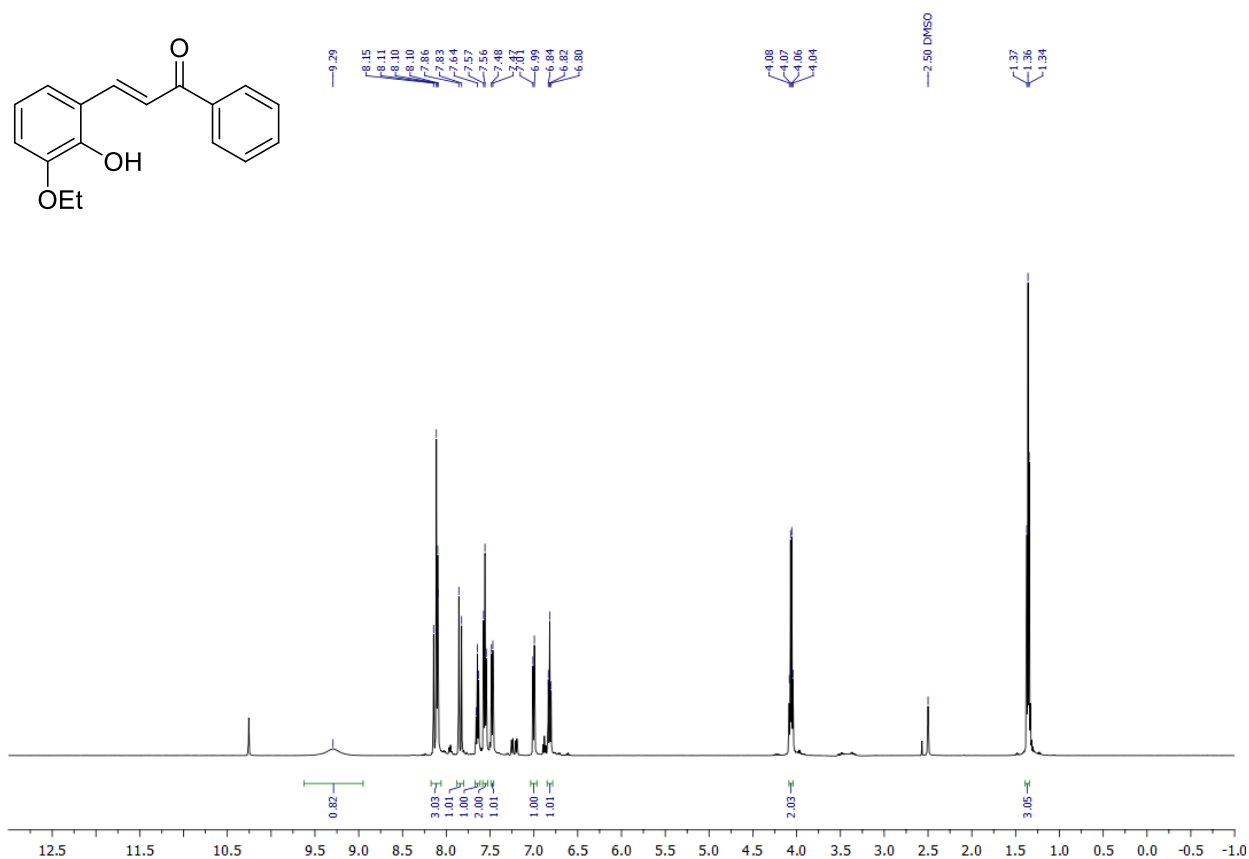

<sup>13</sup>C NMR (126 MHz, DMSO-*d*<sub>6</sub>)

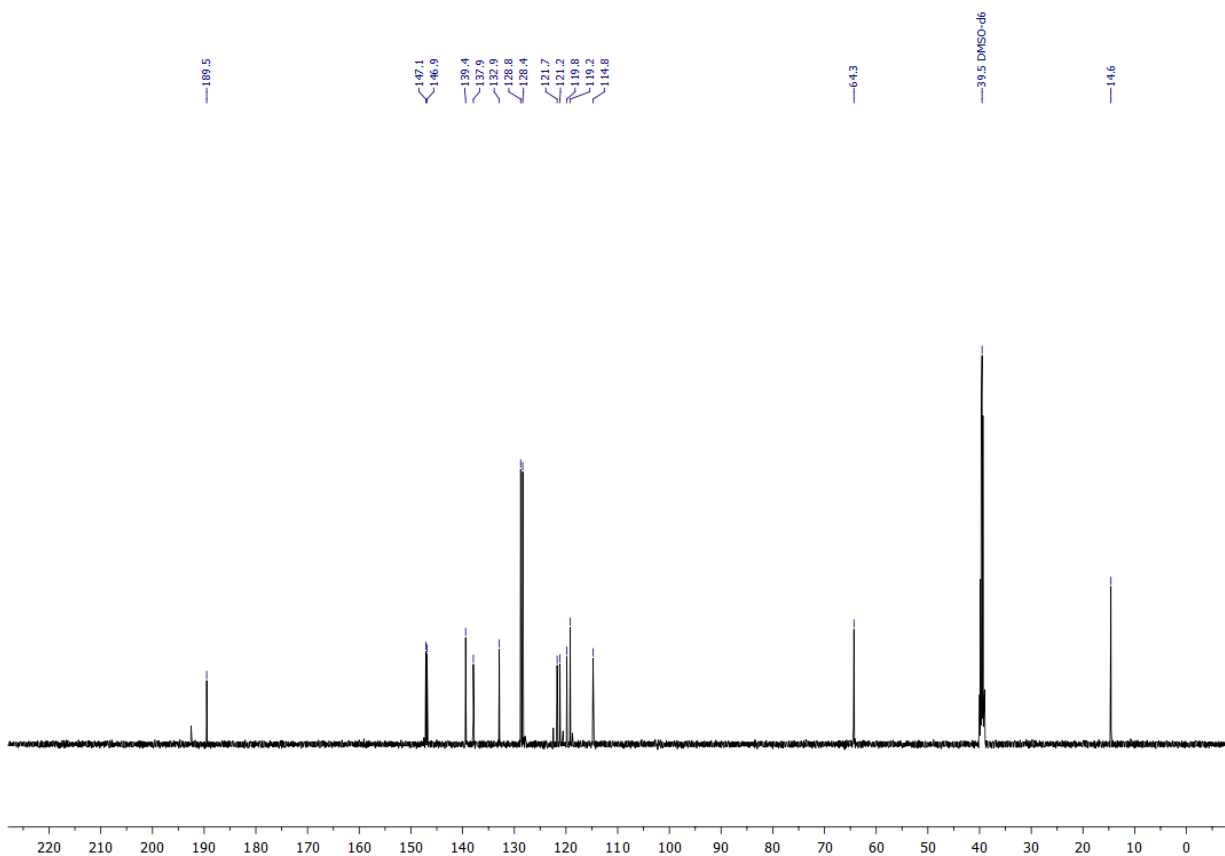

**(E)-3-(3-Ethoxy-2-hydroxyphenyl)-1-(2-thienyl)prop-2-en-1-one (1p)**

<sup>1</sup>H NMR (500 MHz, DMSO-*d*<sub>6</sub>)

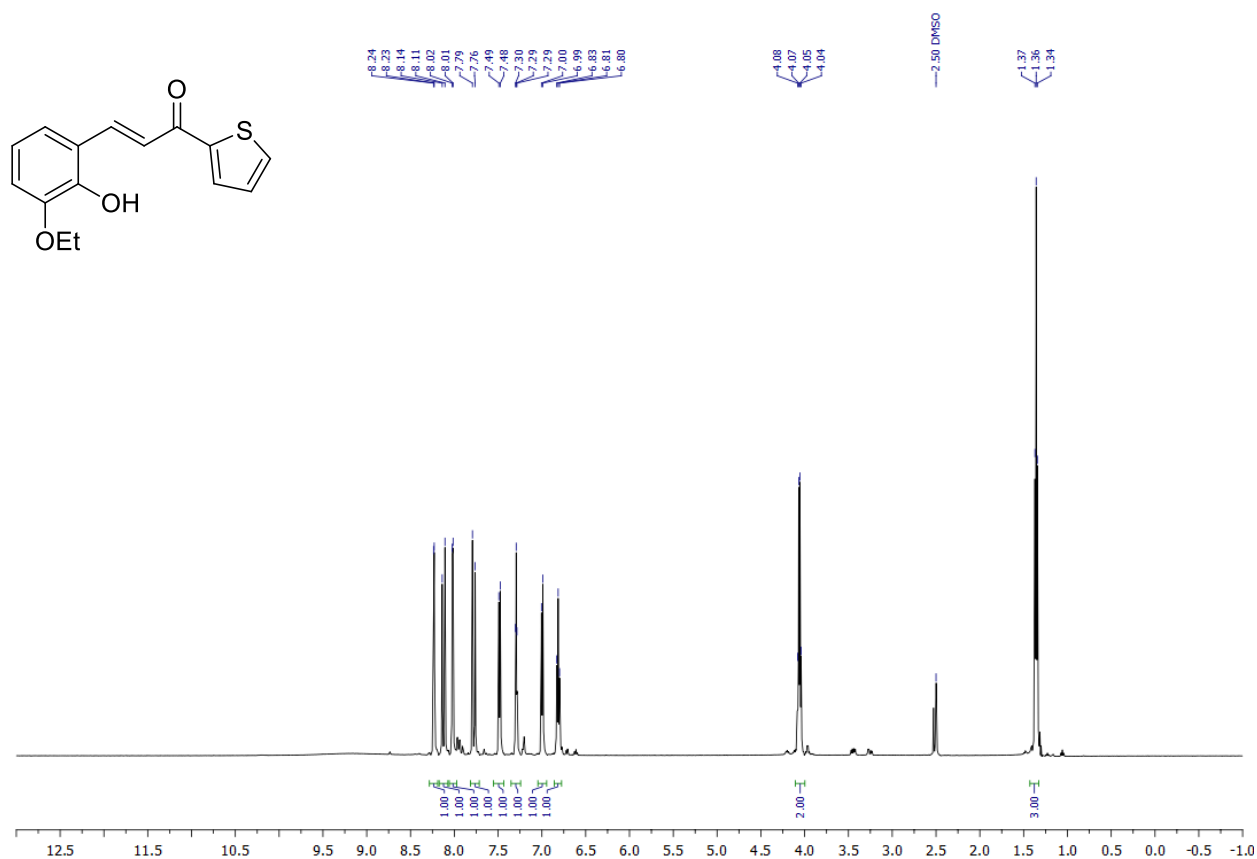

<sup>13</sup>C NMR (126 MHz, DMSO-*d*<sub>6</sub>)

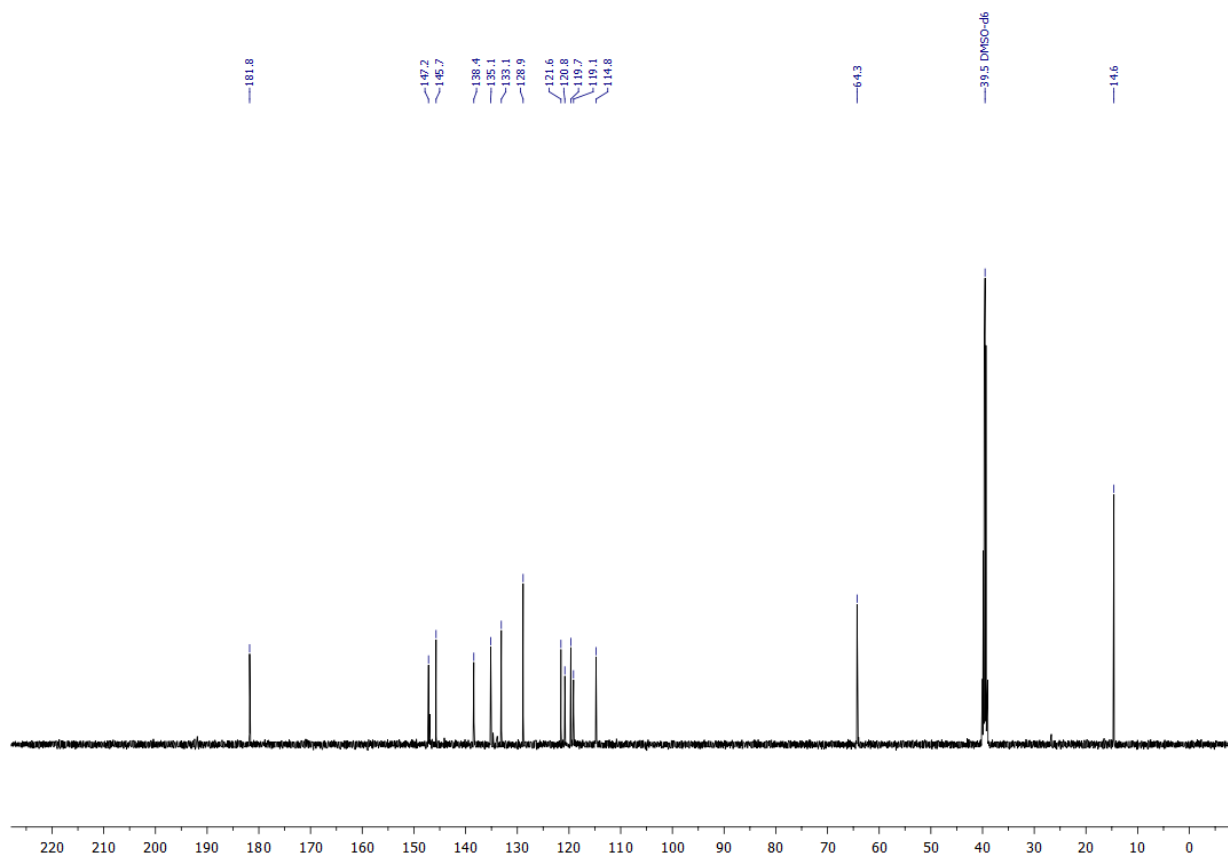

**[(1*RS*,2*RS*)-2-(2-Hydroxyphenyl)cyclopropyl](phenyl)methanone (2a)**

<sup>1</sup>H NMR (500 MHz, CDCl<sub>3</sub>)

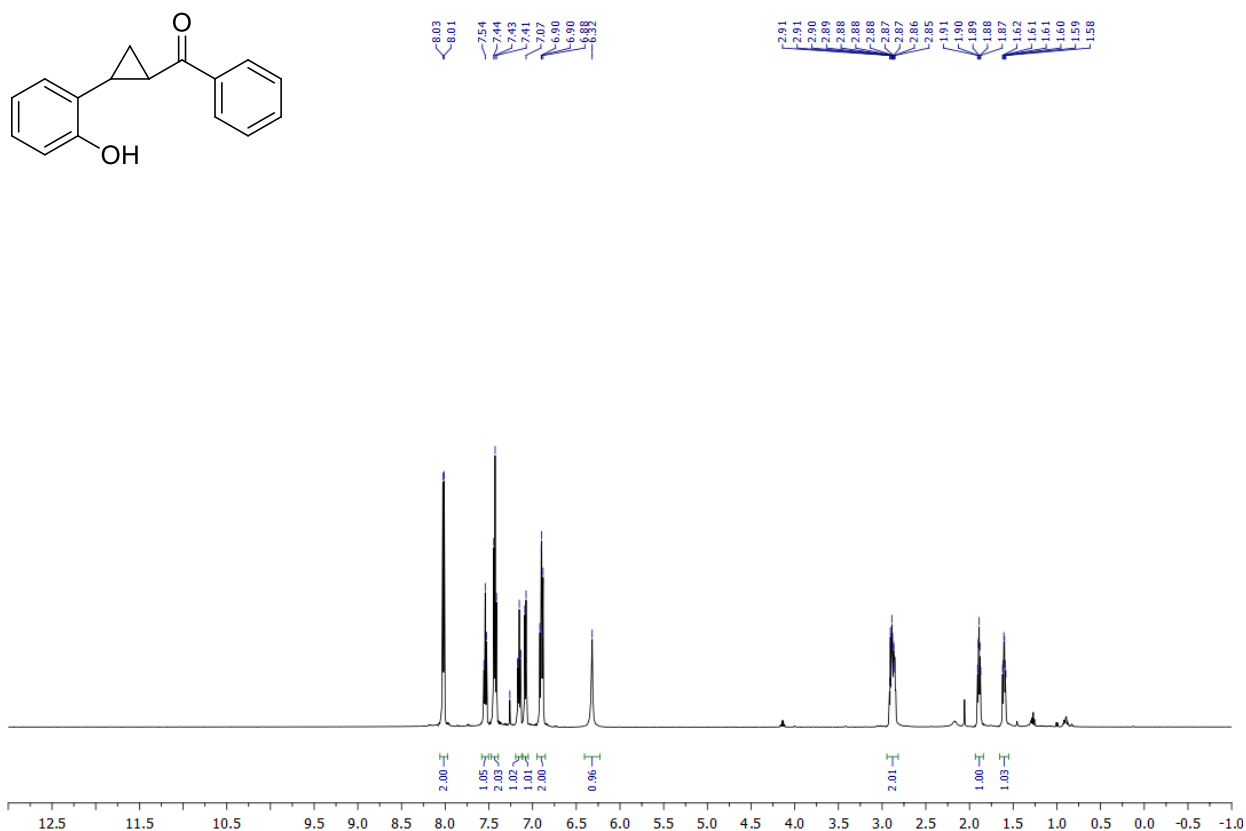

<sup>1</sup>H NMR (500 MHz, DMSO-*d*<sub>6</sub>)

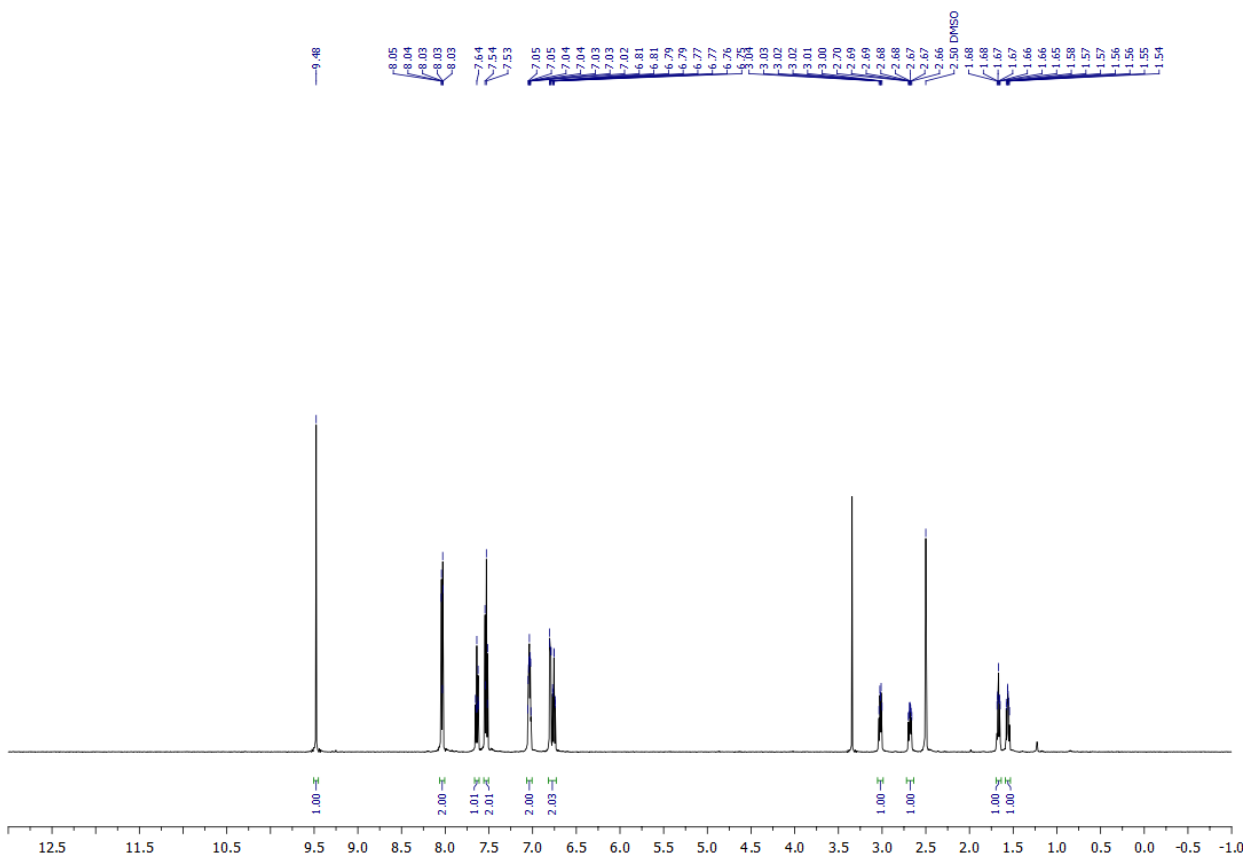

$^{13}\text{C}$  NMR (126 MHz,  $\text{CDCl}_3$ )

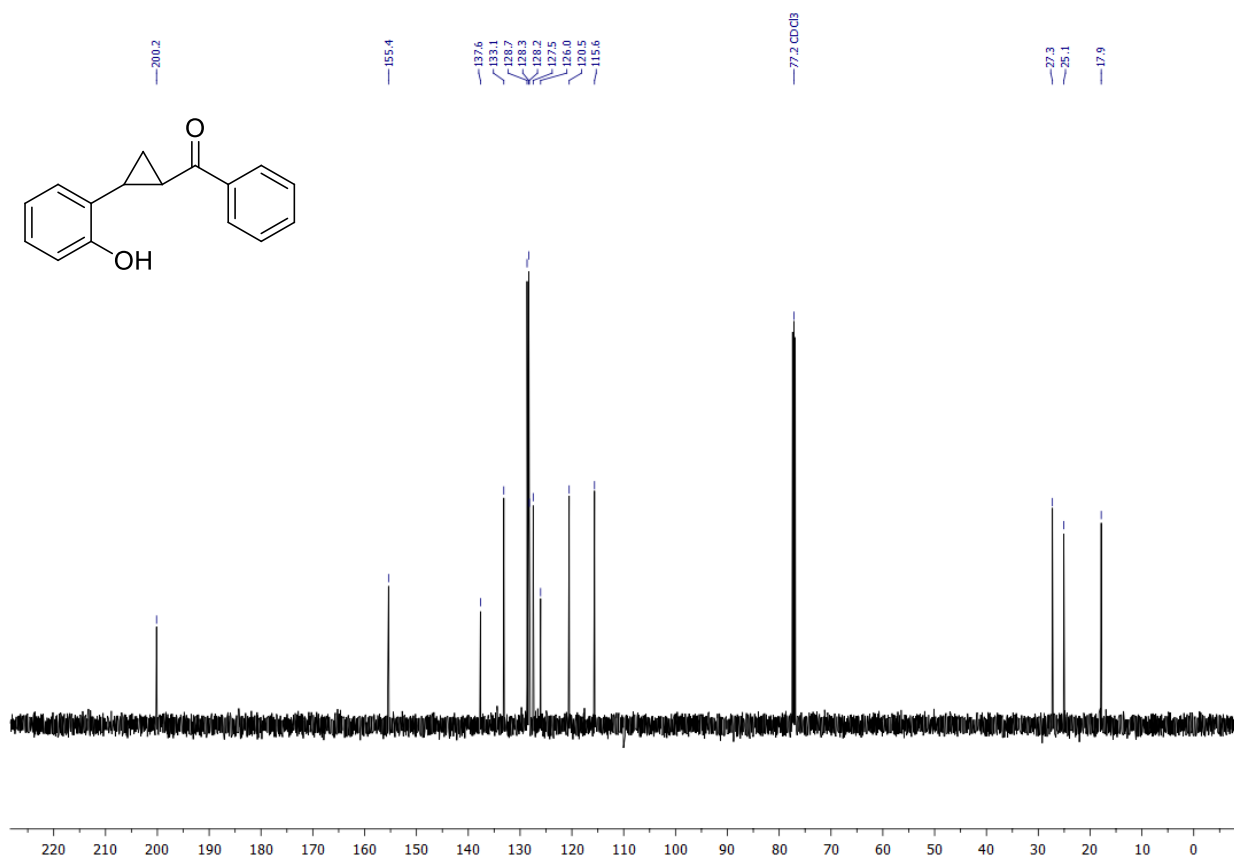

**[(1*RS*,2*RS*)-2-(2-Hydroxyphenyl)cyclopropyl](4-methoxyphenyl)methanone (2b)**

<sup>1</sup>H NMR (500 MHz, DMSO-*d*<sub>6</sub>)

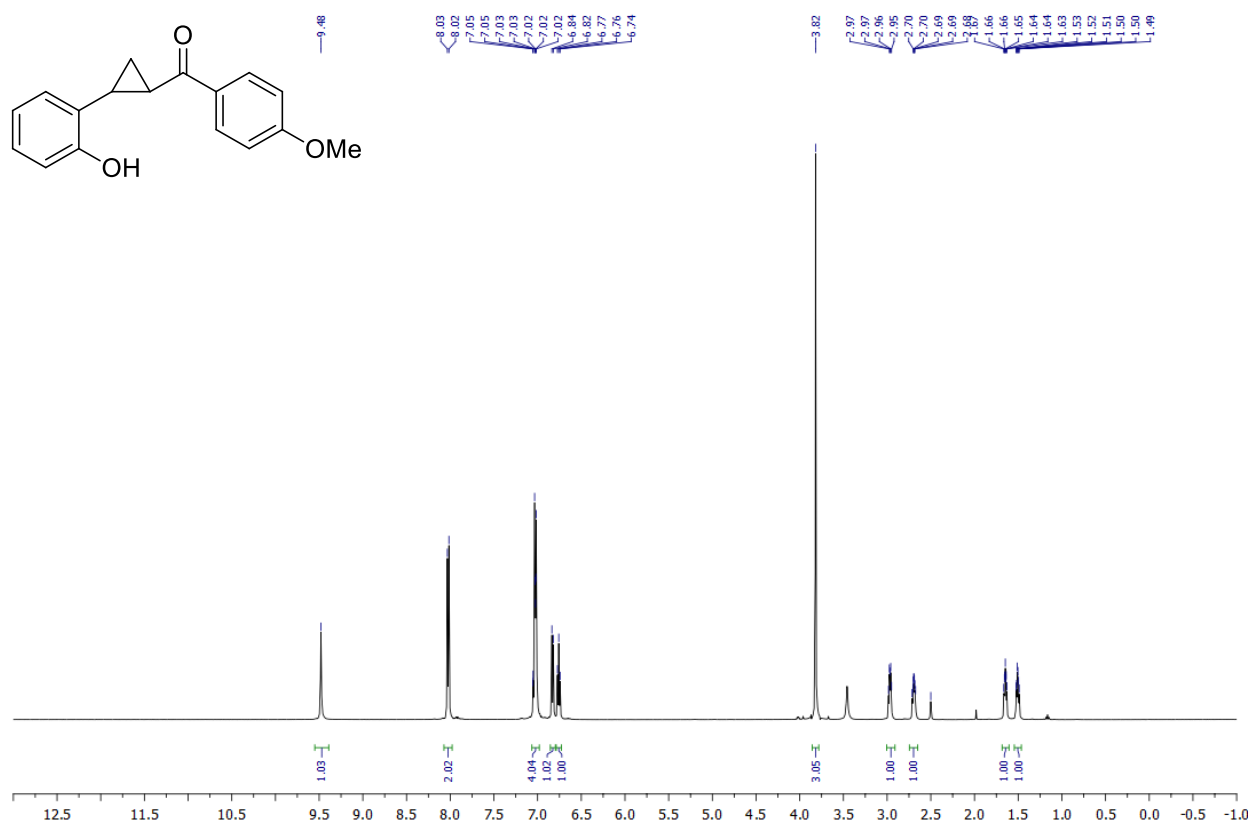

<sup>13</sup>C NMR (126 MHz, DMSO-*d*<sub>6</sub>)

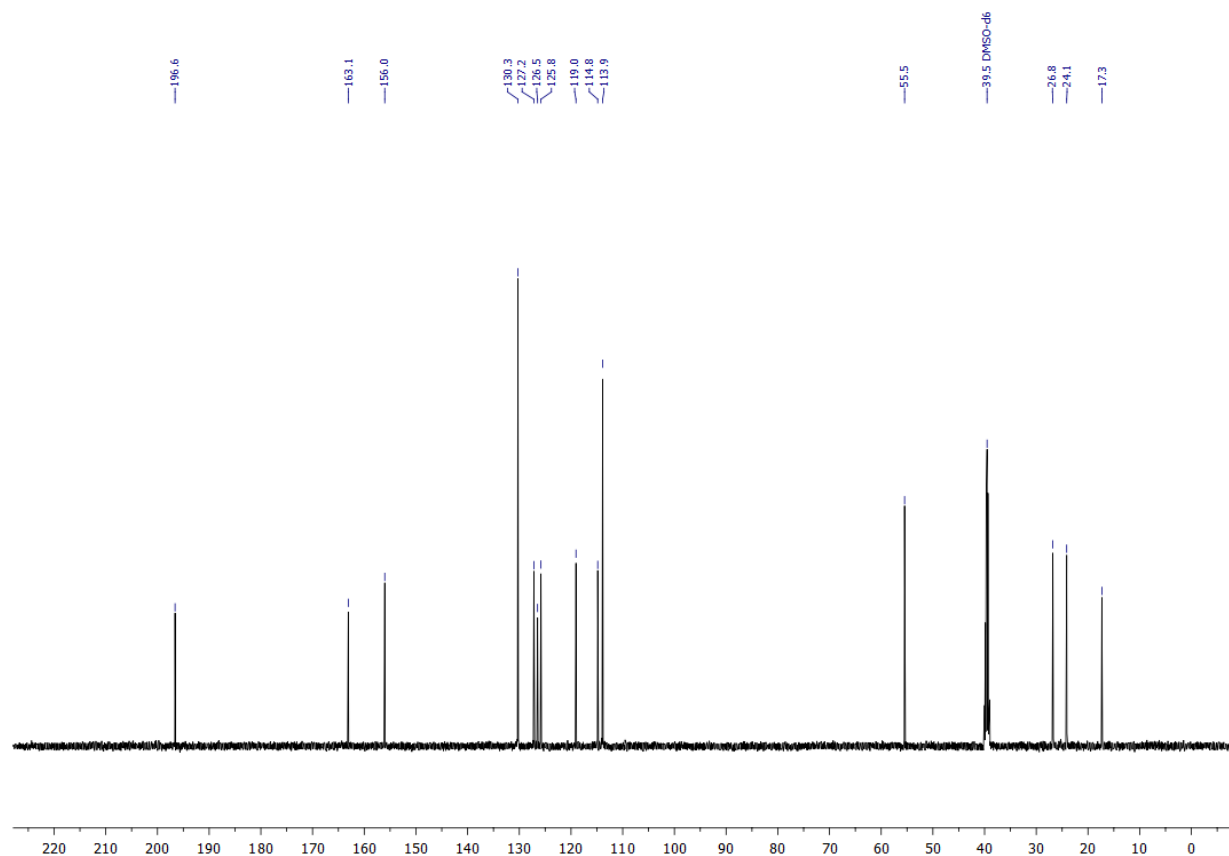



**[(1*RS*,2*RS*)-2-(2-Hydroxyphenyl)cyclopropyl](thiophen-2-yl)methanone (2c)**

<sup>1</sup>H NMR (500 MHz, CDCl<sub>3</sub>)

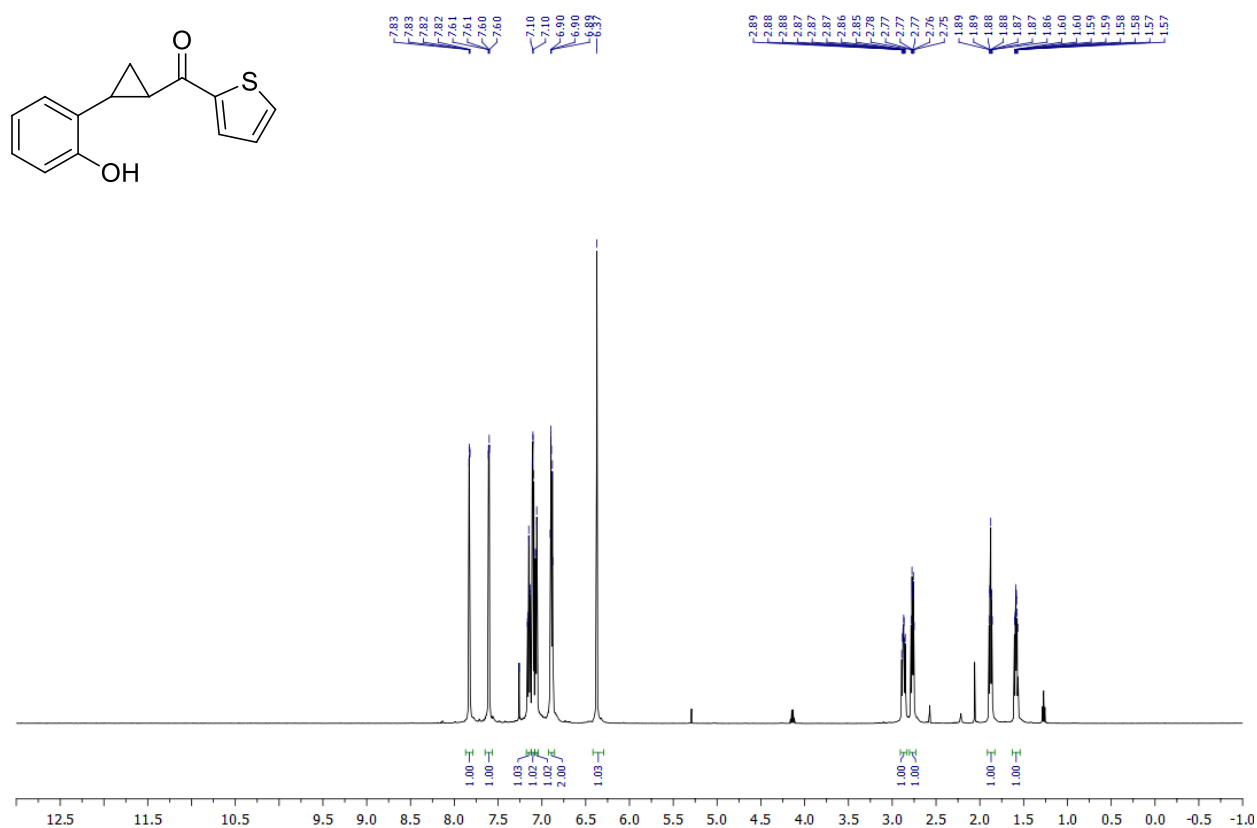

<sup>13</sup>C NMR (126 MHz, CDCl<sub>3</sub>)

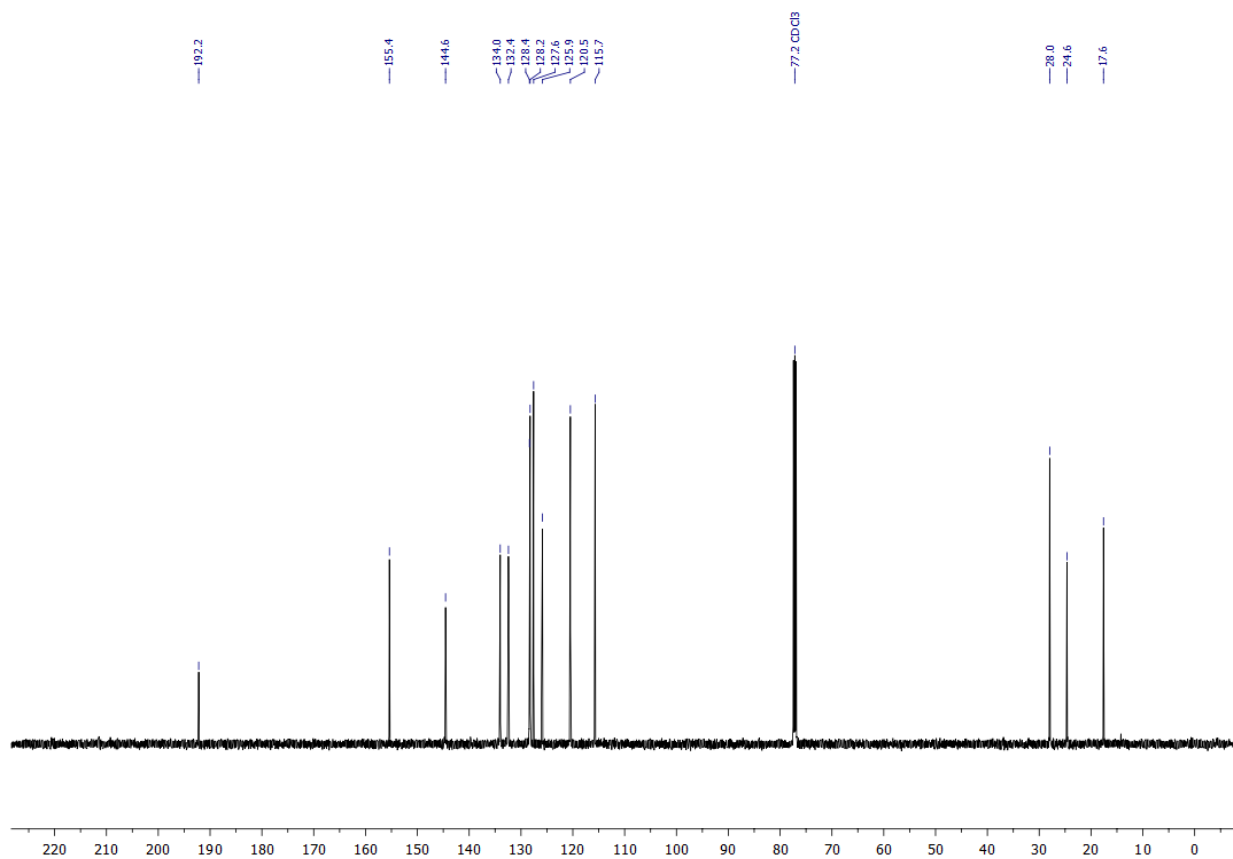

**[(1*RS*,2*RS*)-2-(5-Fluoro-2-hydroxyphenyl)cyclopropyl](4-methoxyphenyl)methanone (2d)**

<sup>1</sup>H NMR (500 MHz, DMSO-*d*<sub>6</sub>)

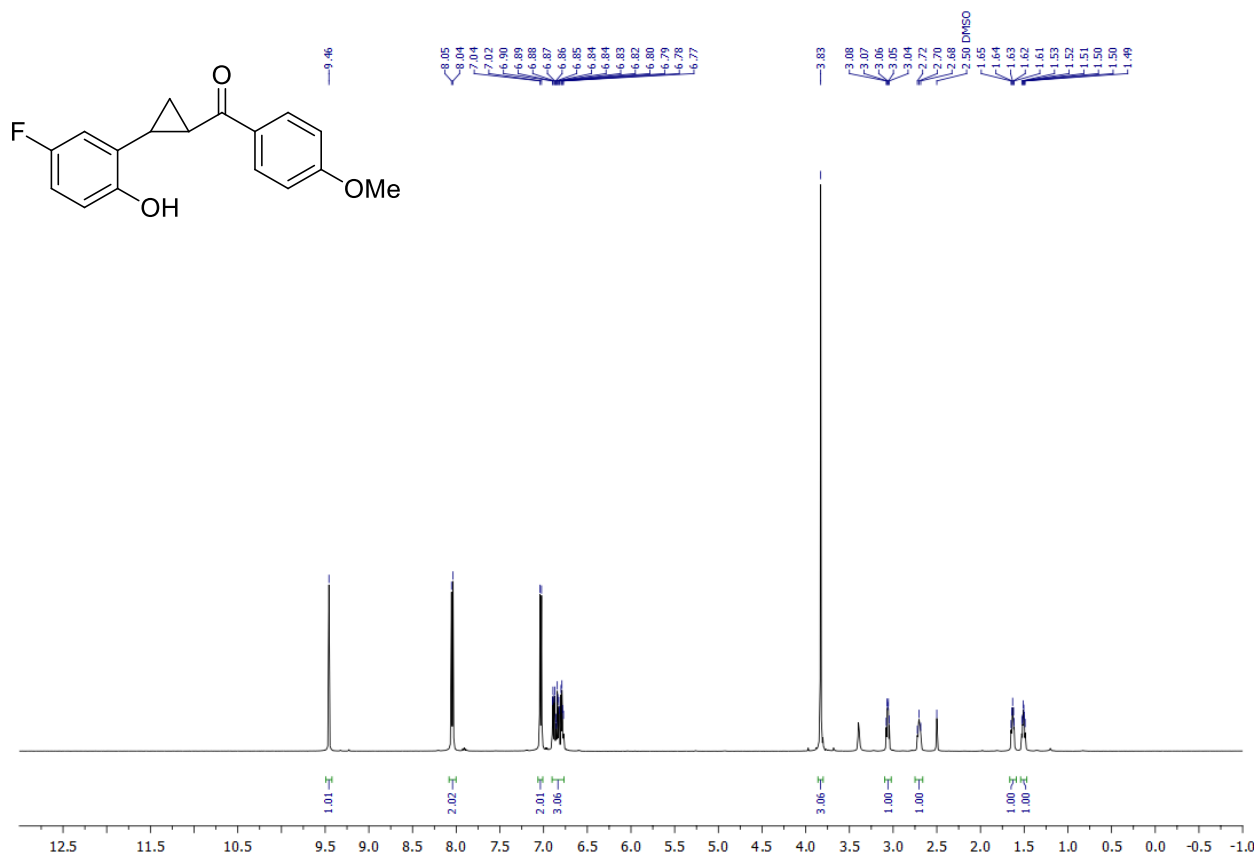

<sup>13</sup>C NMR (126 MHz, DMSO-*d*<sub>6</sub>)

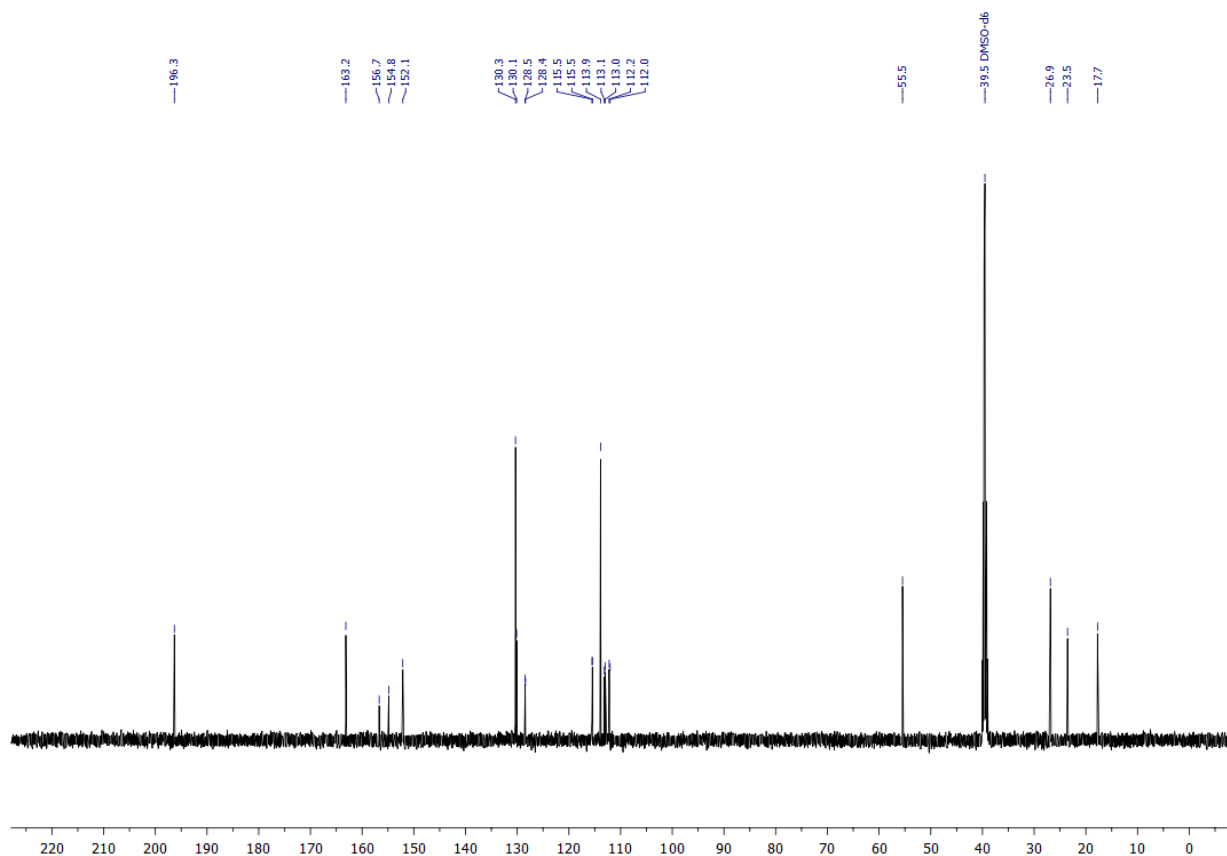

***[(1*RS*,2*RS*)-2-(5-Fluoro-2-hydroxyphenyl)cyclopropyl](4-methoxyphenyl)methanone (2d)***

<sup>19</sup>F NMR (471 MHz, DMSO-*d*<sub>6</sub>)

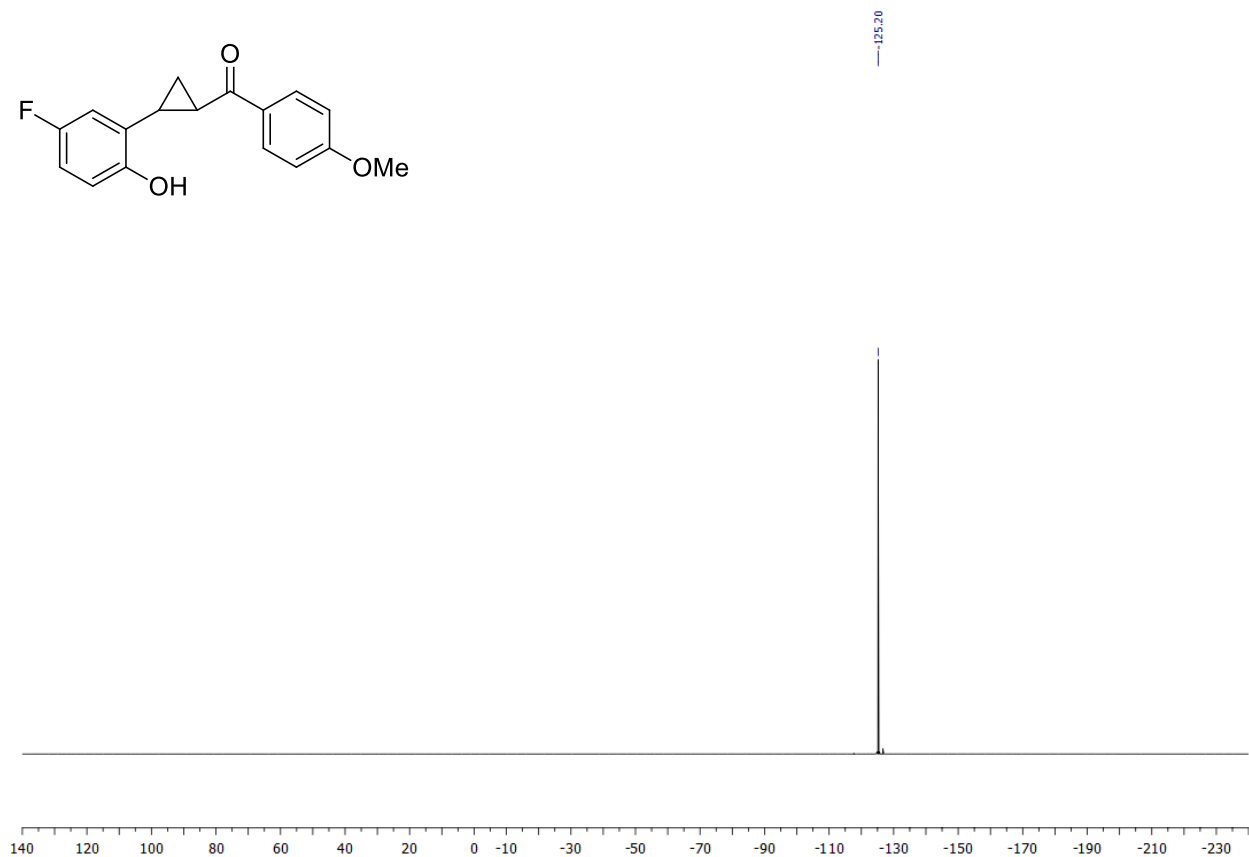

**[(1*RS*,2*RS*)-2-(5-Bromo-2-hydroxyphenyl)cyclopropyl](4-methoxyphenyl)methanone (2e)**

<sup>1</sup>H NMR (500 MHz, CDCl<sub>3</sub>)

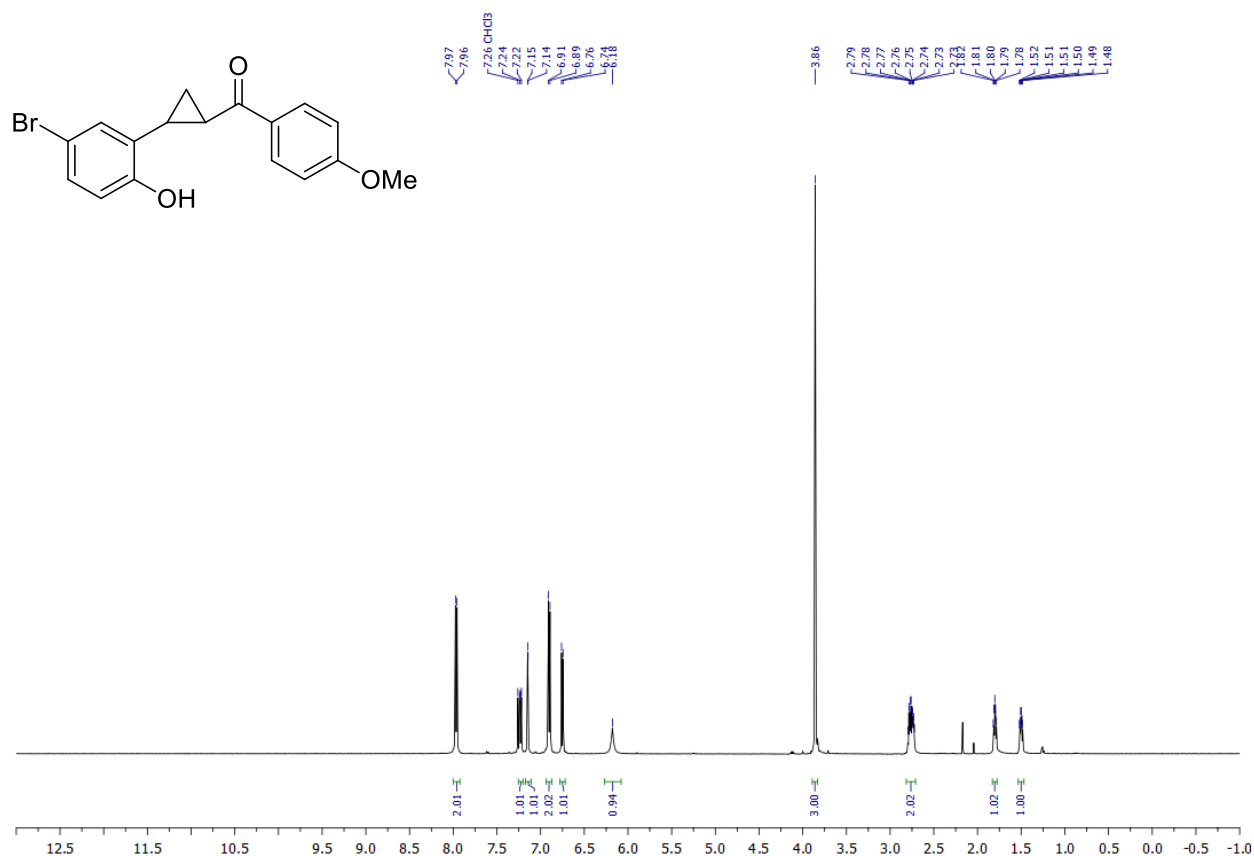

<sup>13</sup>C NMR (126 MHz, CDCl<sub>3</sub>)

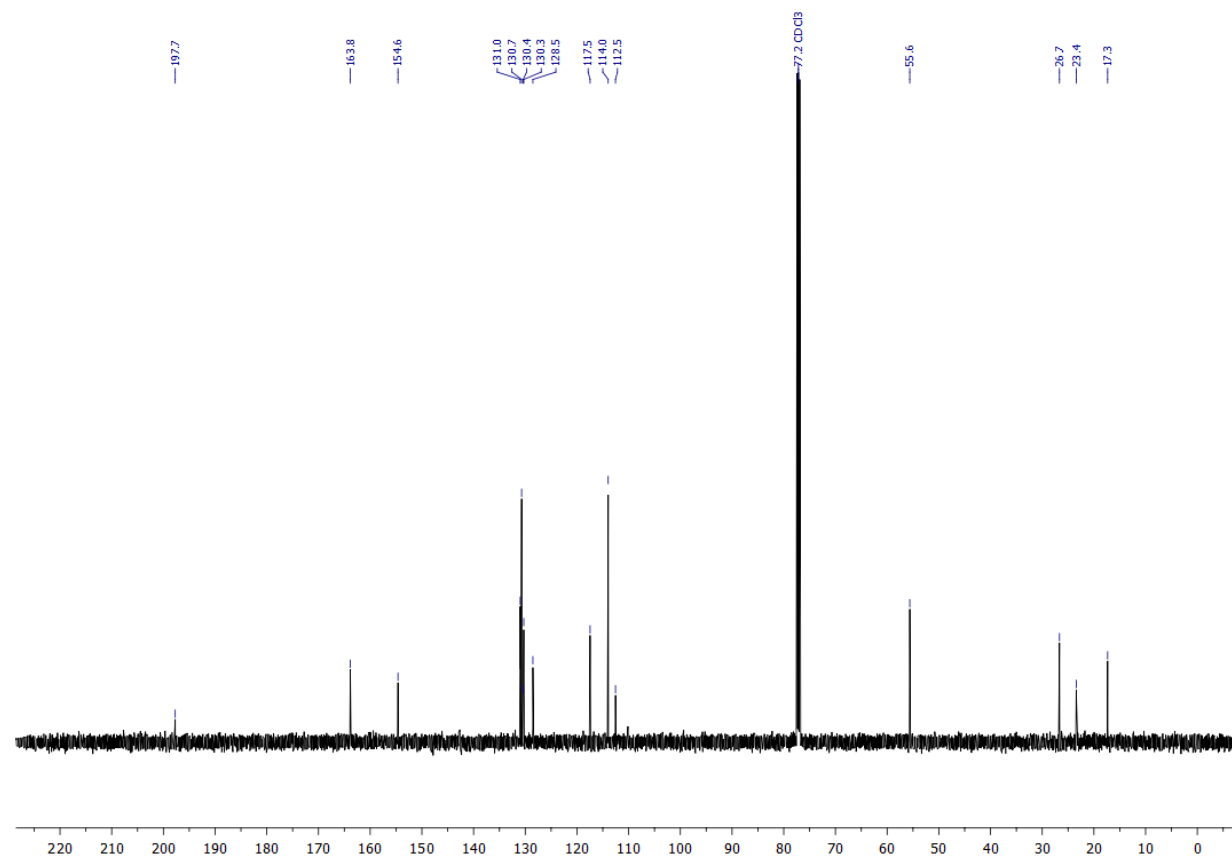

***[(1*RS*,2*RS*)-2-(2-Hydroxy-5-nitrophenyl)cyclopropyl](4-methoxyphenyl)methanone (2f)***

<sup>1</sup>H NMR (500 MHz, DMSO-*d*<sub>6</sub>)

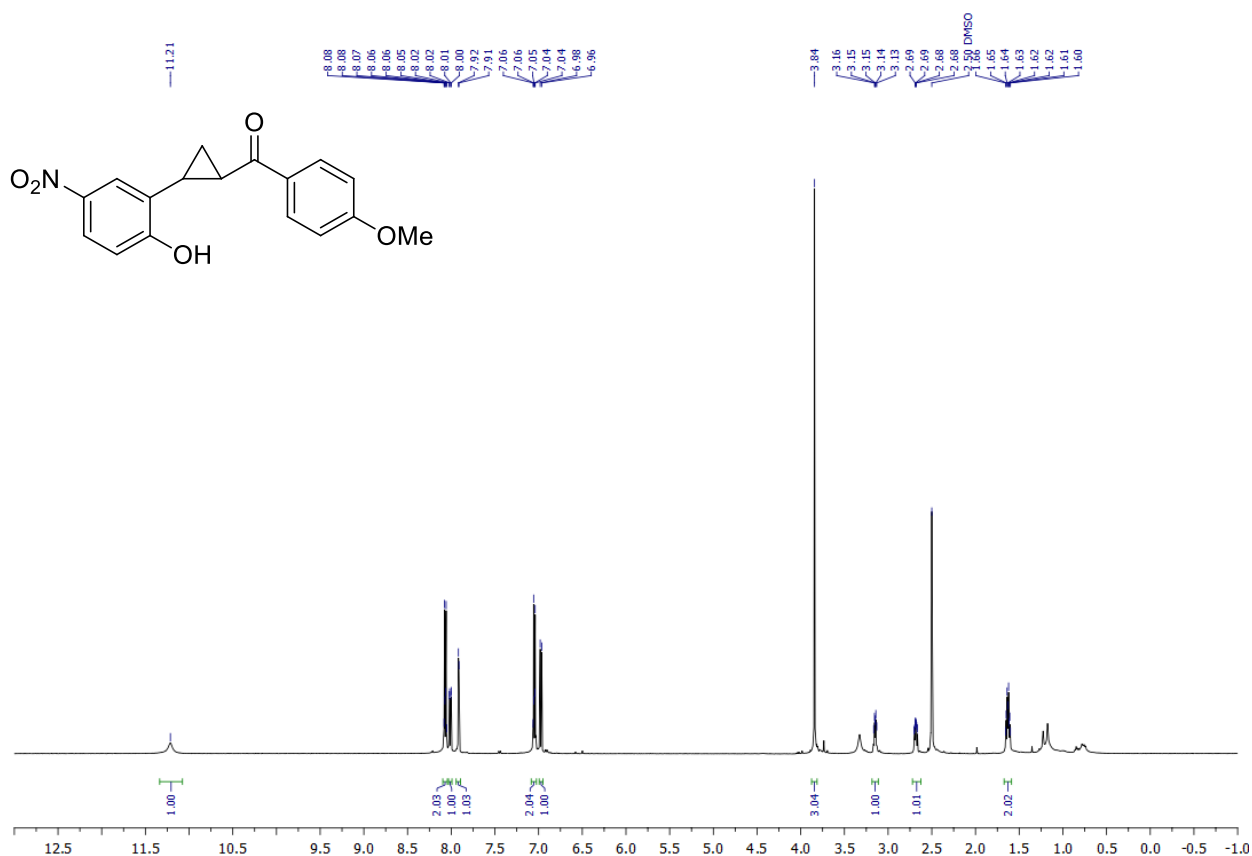

<sup>13</sup>C NMR (126 MHz, DMSO-*d*<sub>6</sub>)

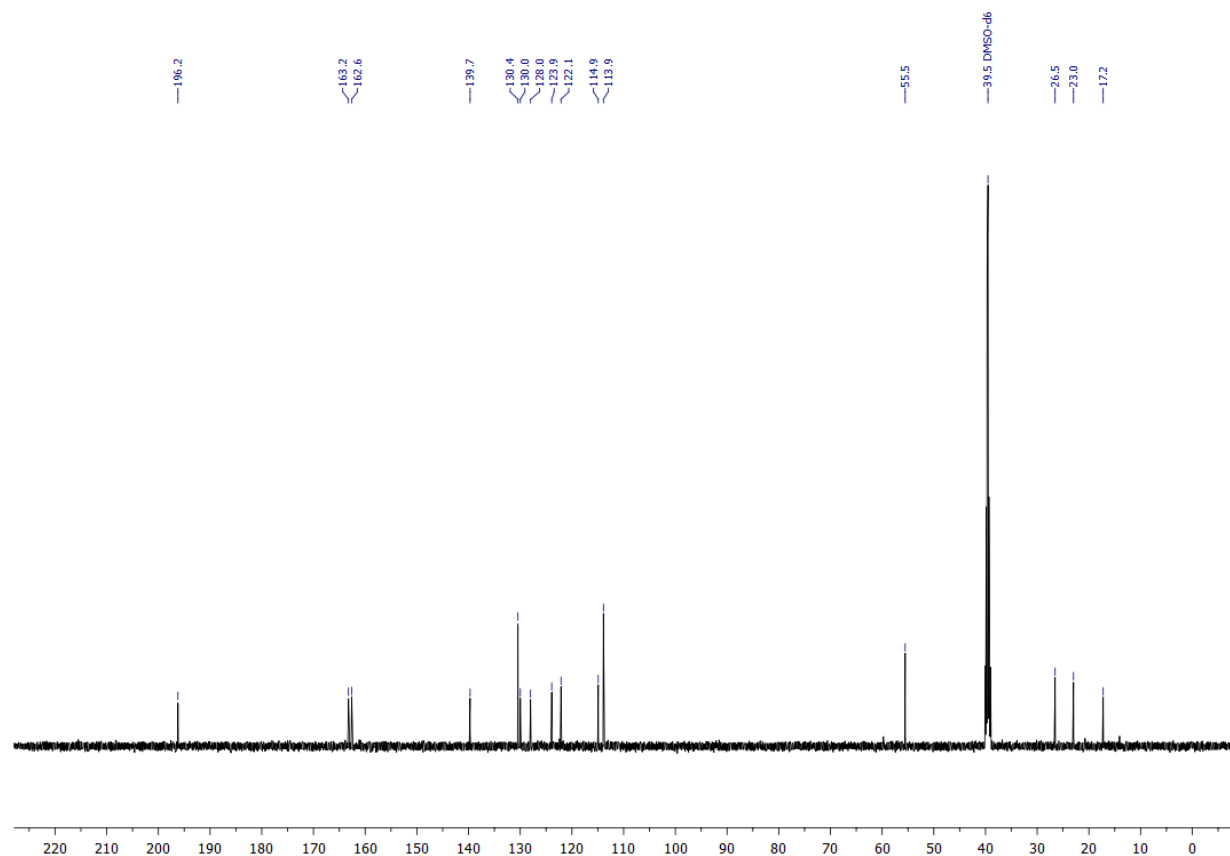

**[(1*RS*,2*RS*)-2-(5-Fluoro-2-hydroxyphenyl)cyclopropyl](phenyl)methanone (2g)**

<sup>1</sup>H NMR (500 MHz, CDCl<sub>3</sub>)

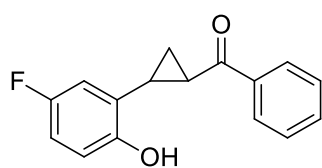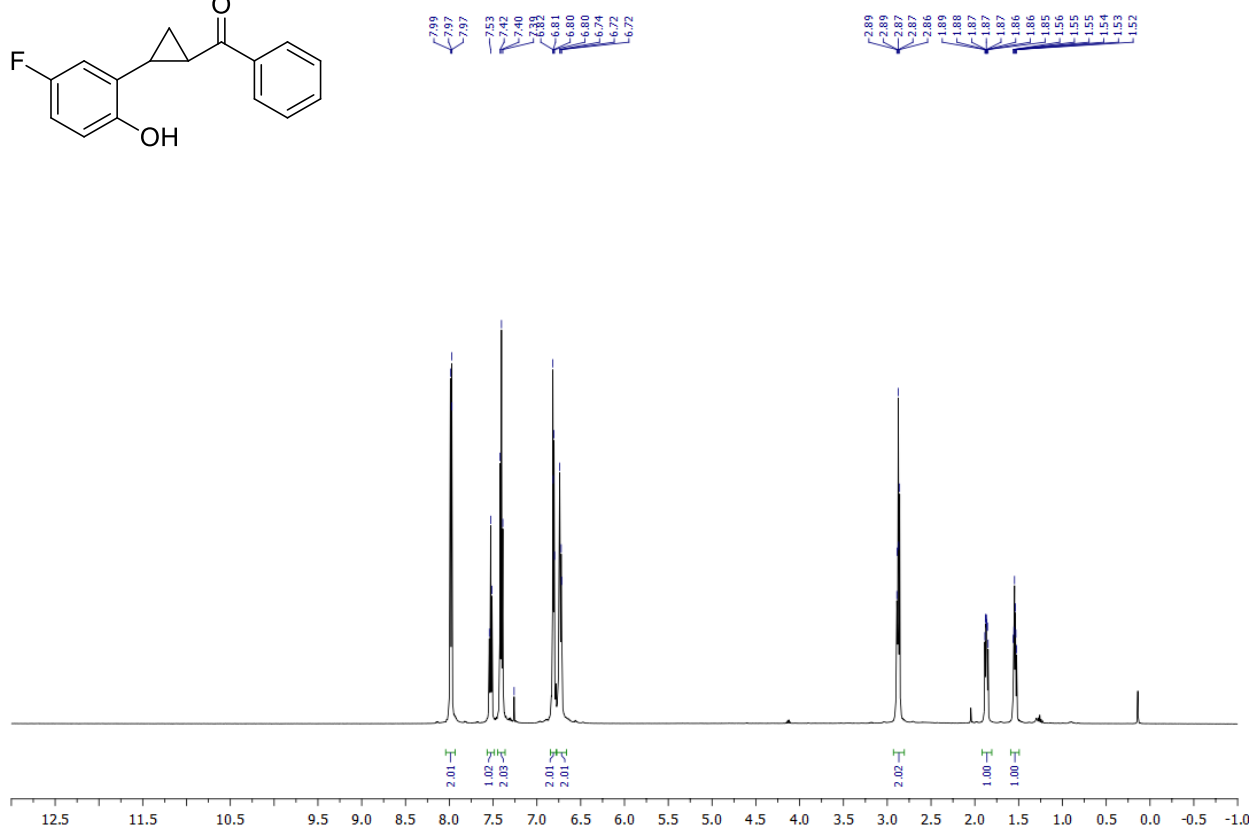

<sup>13</sup>C NMR (126 MHz, CDCl<sub>3</sub>)

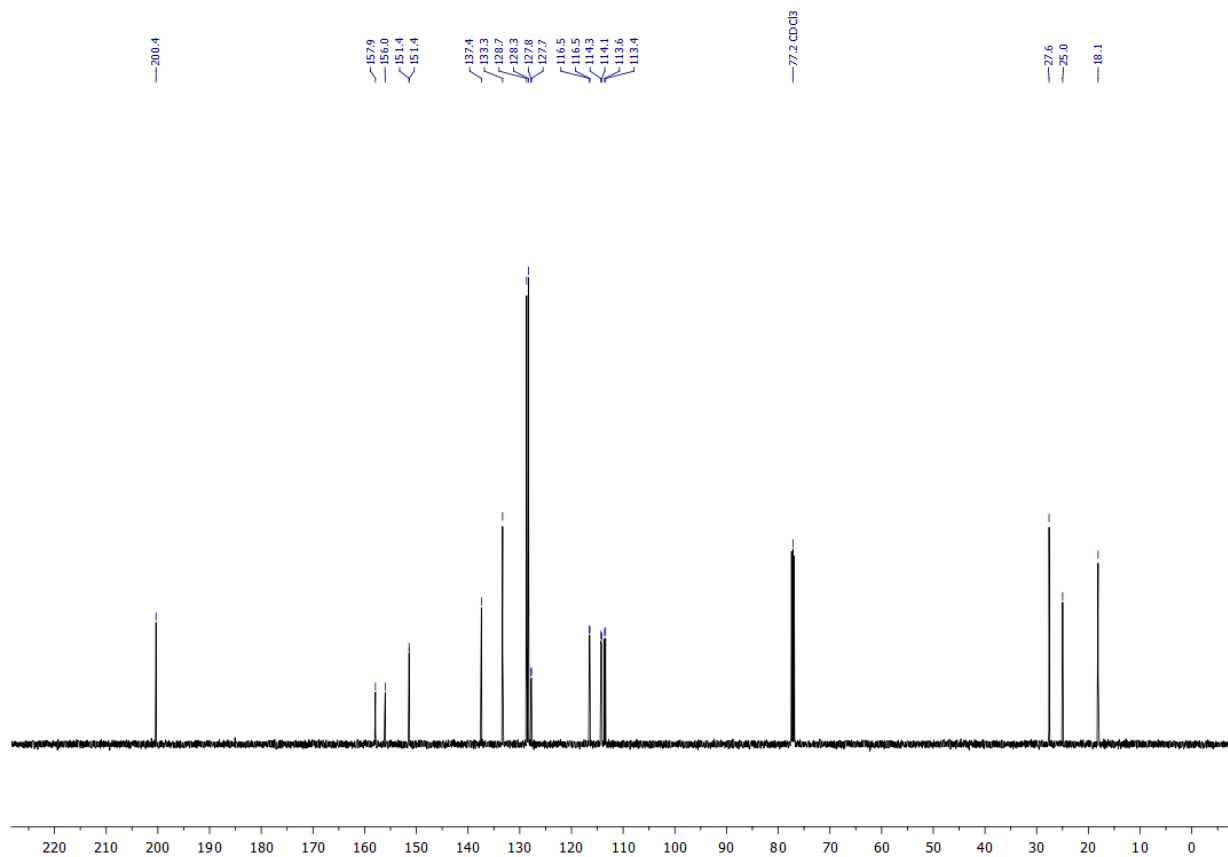

***[(1*RS*,2*RS*)-2-(5-Fluoro-2-hydroxyphenyl)cyclopropyl](phenyl)methanone (2g)***

<sup>19</sup>F NMR (471 MHz, CDCl<sub>3</sub>)

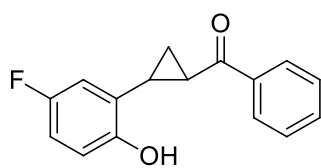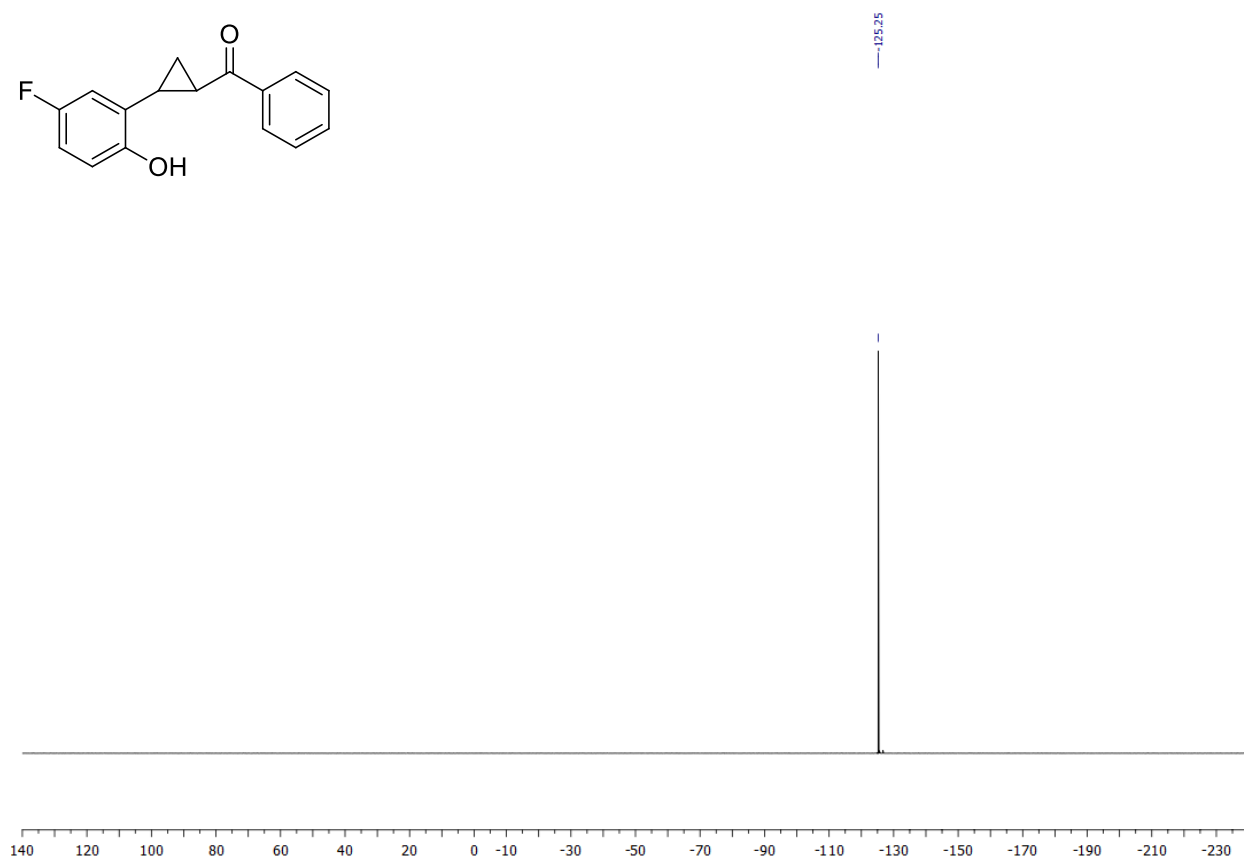

**[(1*RS*,2*RS*)-2-(5-Bromo-2-hydroxyphenyl)cyclopropyl](phenyl)methanone (2h)**

<sup>1</sup>H NMR (500 MHz, CDCl<sub>3</sub>)

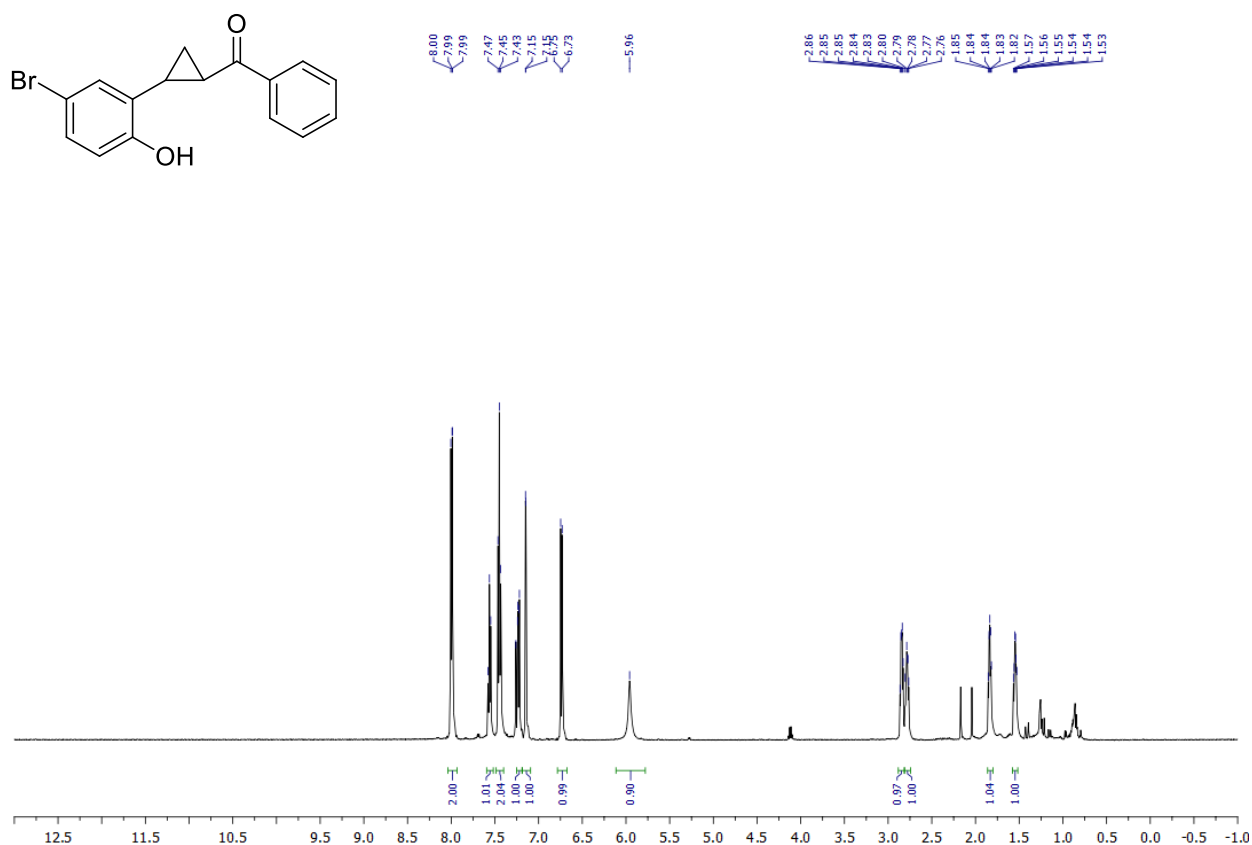

<sup>13</sup>C NMR (126 MHz, CDCl<sub>3</sub>)

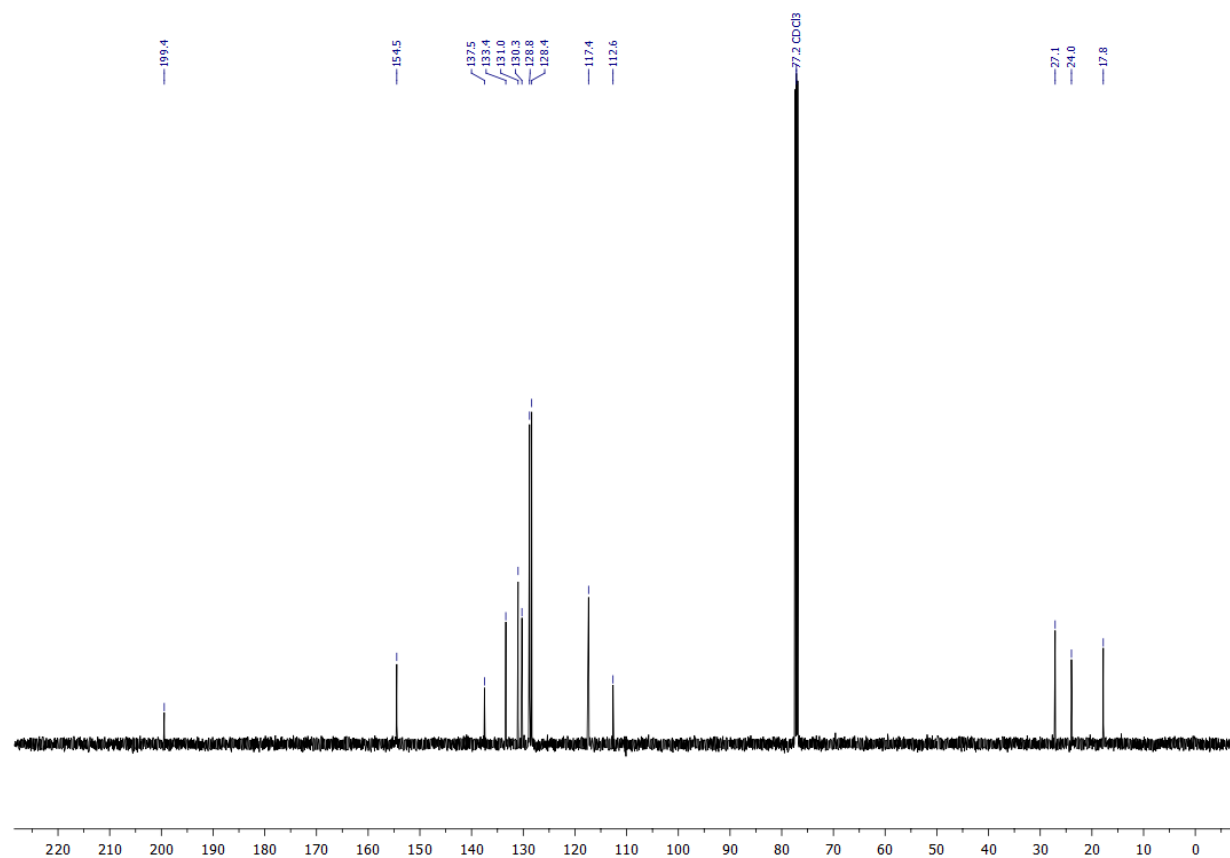



**[(1*R*,2*R*)-2-(2-Hydroxy-5-nitrophenyl)cyclopropyl](phenyl)methanone (2i)**

<sup>1</sup>H NMR (400 MHz, DMSO-*d*<sub>6</sub>)

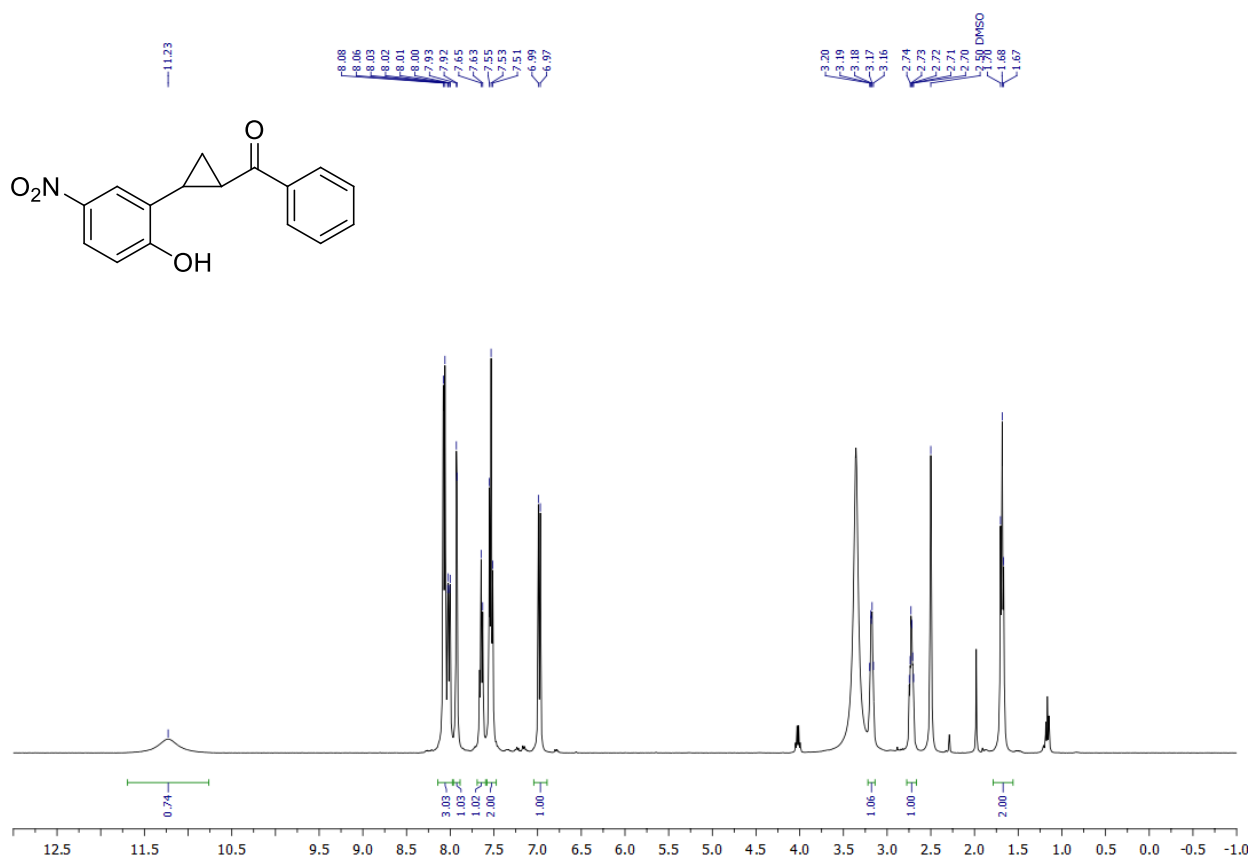

<sup>13</sup>C NMR (101 MHz, DMSO-*d*<sub>6</sub>)

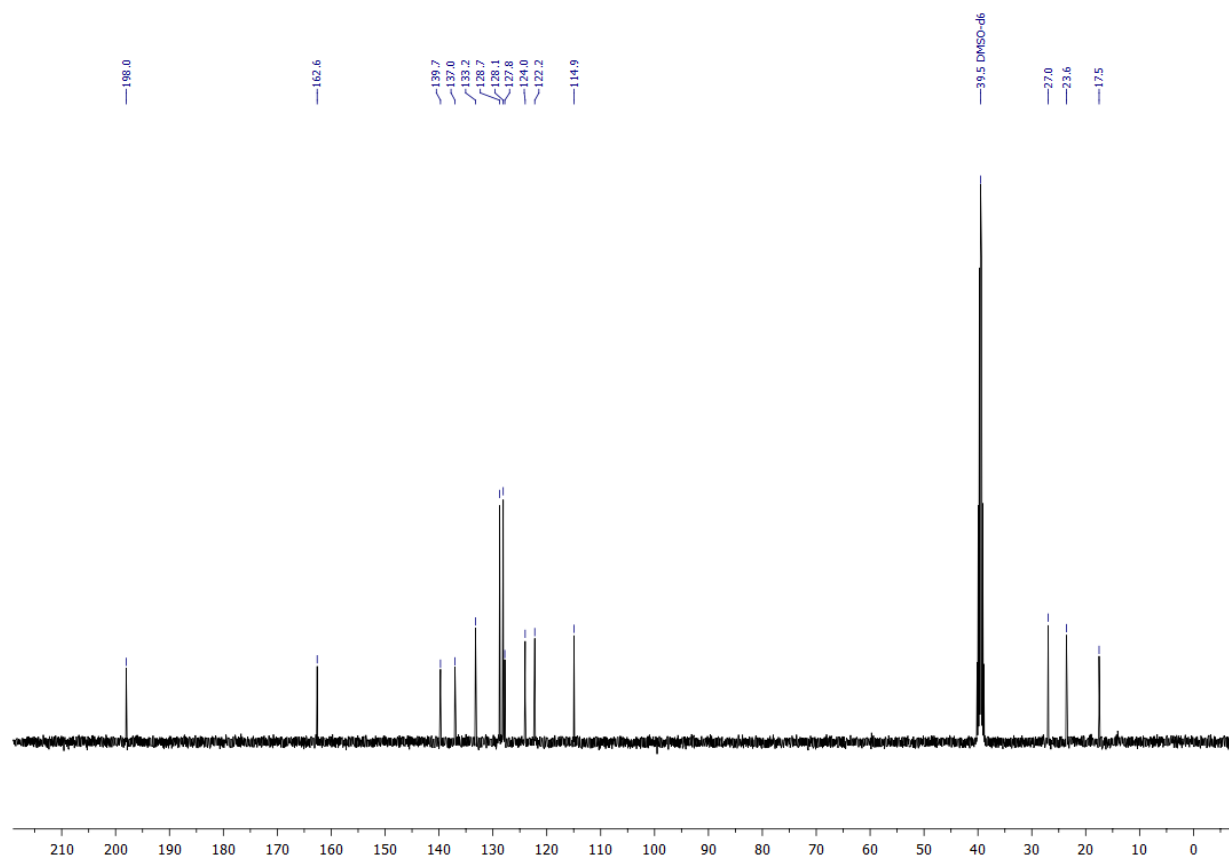

**[(1*RS*,2*RS*)-2-(5-Fluoro-2-hydroxyphenyl)cyclopropyl](thiophen-2-yl)methanone (2j)**

<sup>1</sup>H NMR (500 MHz, CDCl<sub>3</sub>)

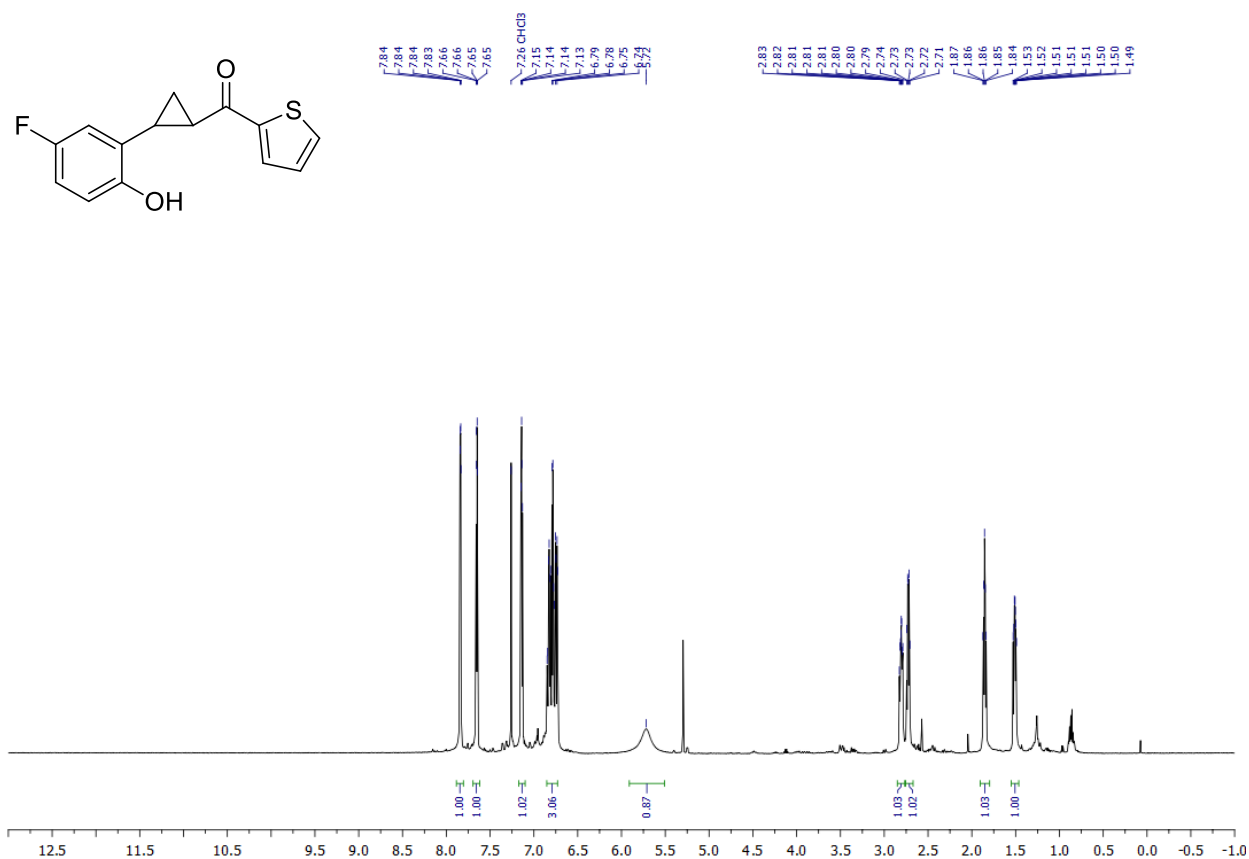

<sup>13</sup>C NMR (126 MHz, CDCl<sub>3</sub>)

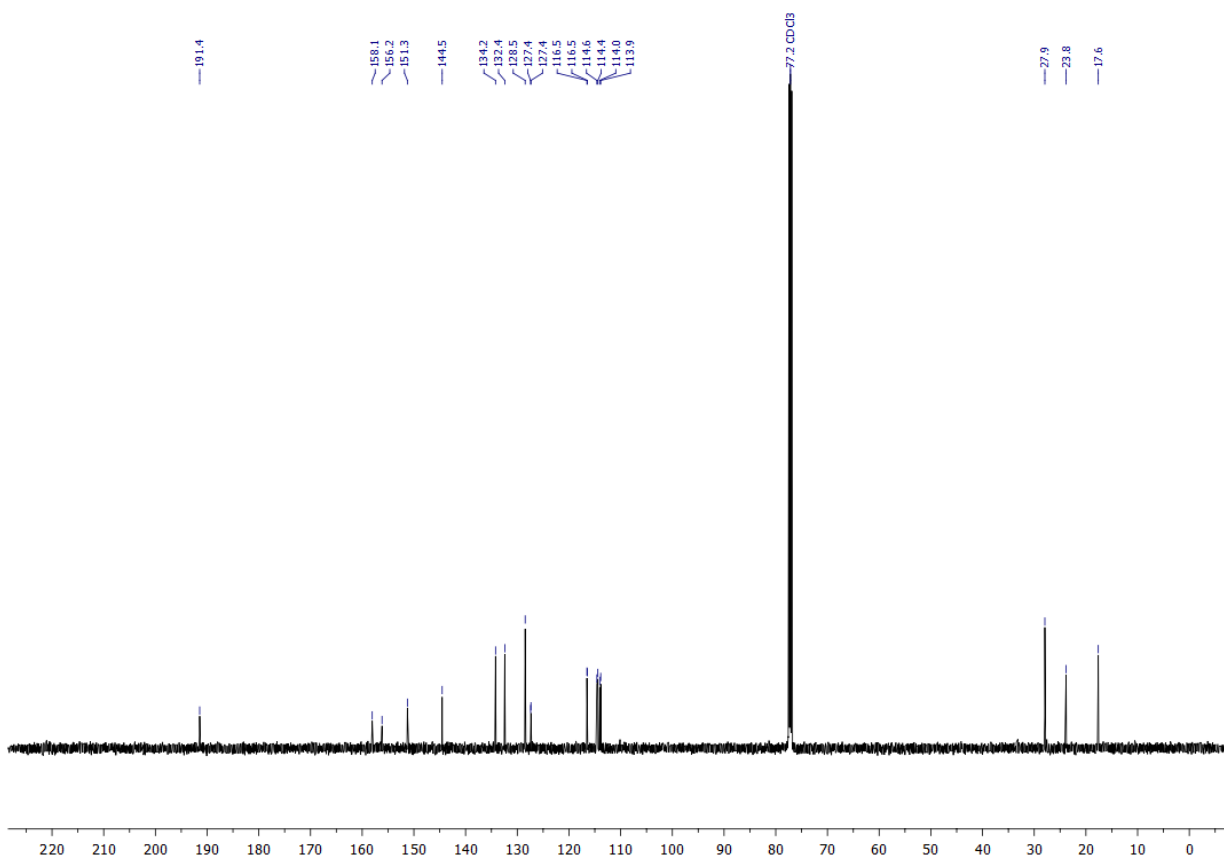

***[(1*RS*,2*RS*)-2-(5-Fluoro-2-hydroxyphenyl)cyclopropyl](thiophen-2-yl)methanone (2j)***

<sup>19</sup>F NMR (471 MHz, CDCl<sub>3</sub>)

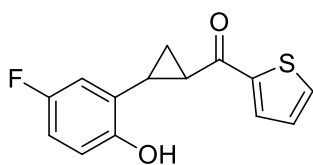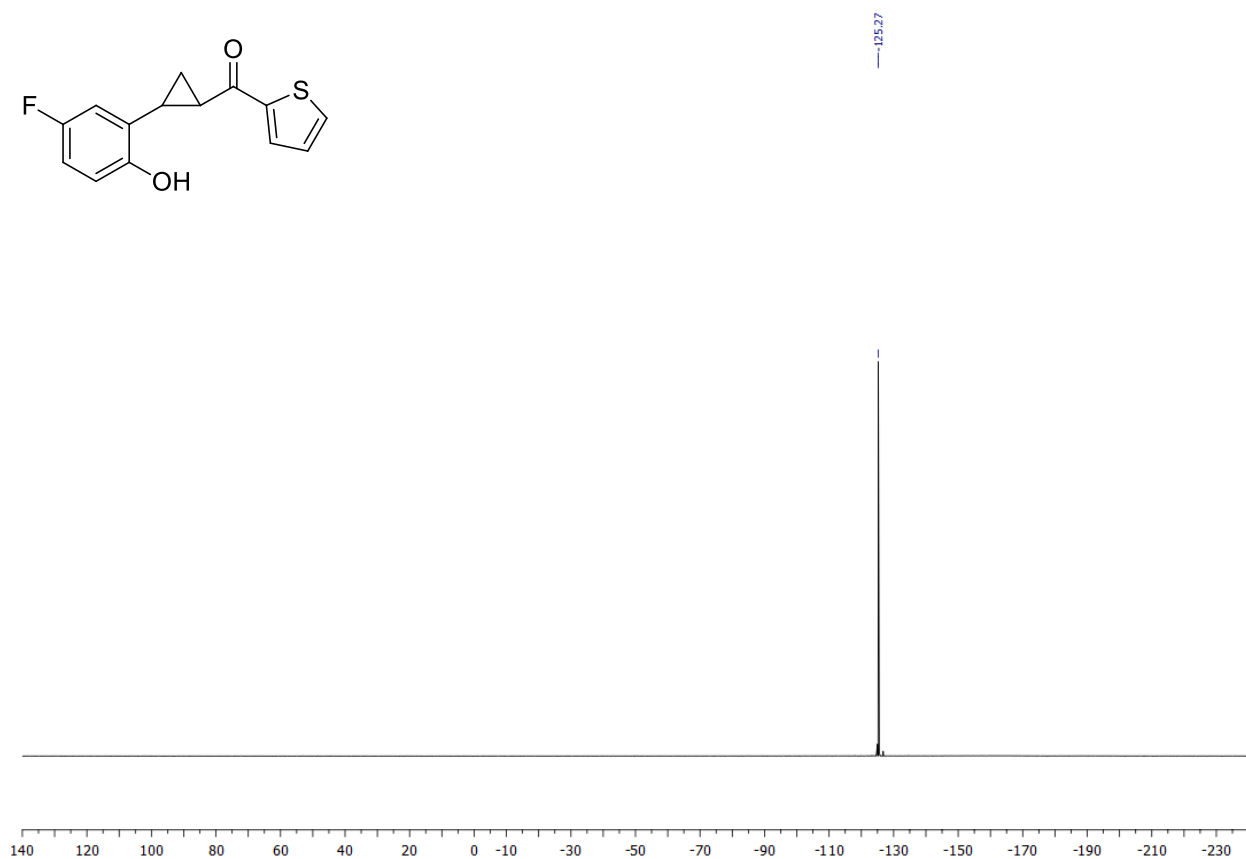

**[(1*RS*,2*RS*)-2-(5-Chloro-2-hydroxyphenyl)cyclopropyl](thiophen-2-yl)methanone (2k)**

<sup>1</sup>H NMR (500 MHz, CDCl<sub>3</sub>)

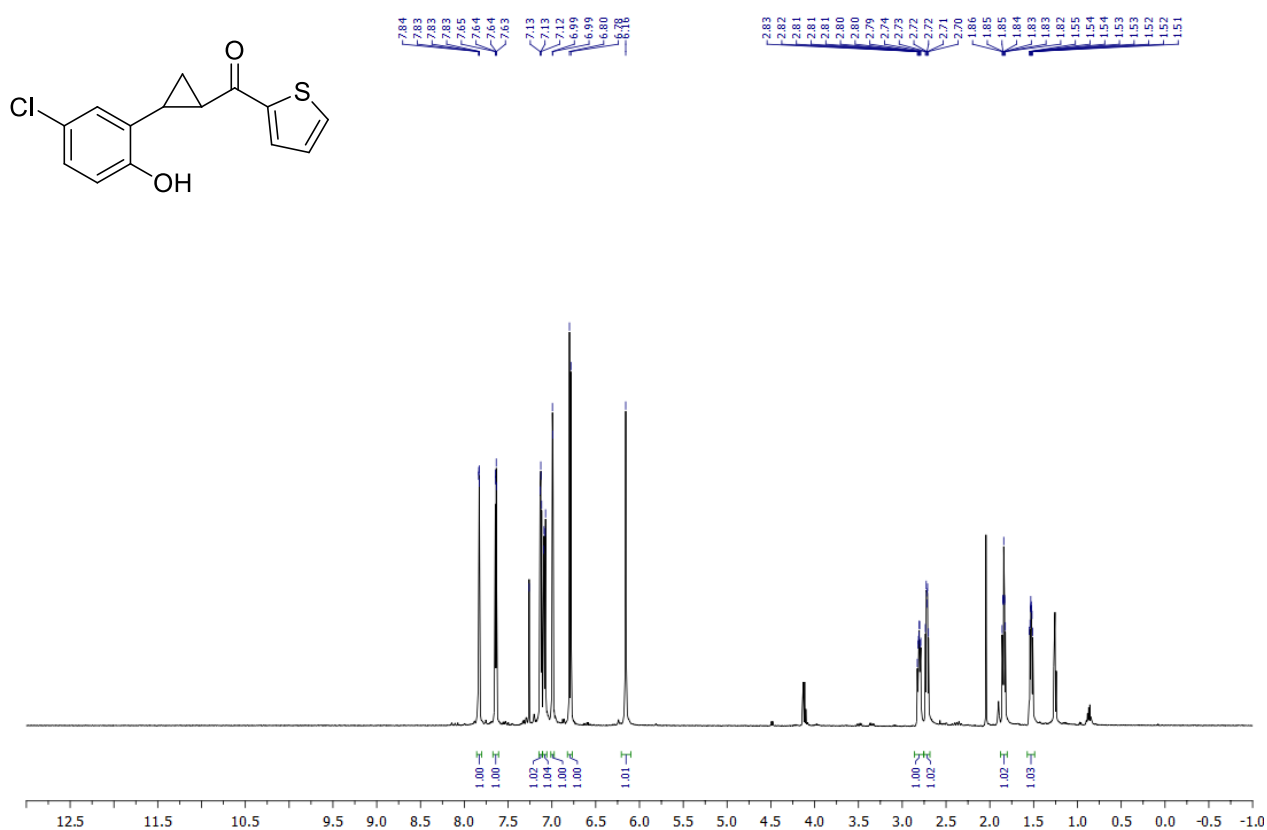

<sup>1</sup>H NMR (500 MHz, DMSO-*d*<sub>6</sub>)

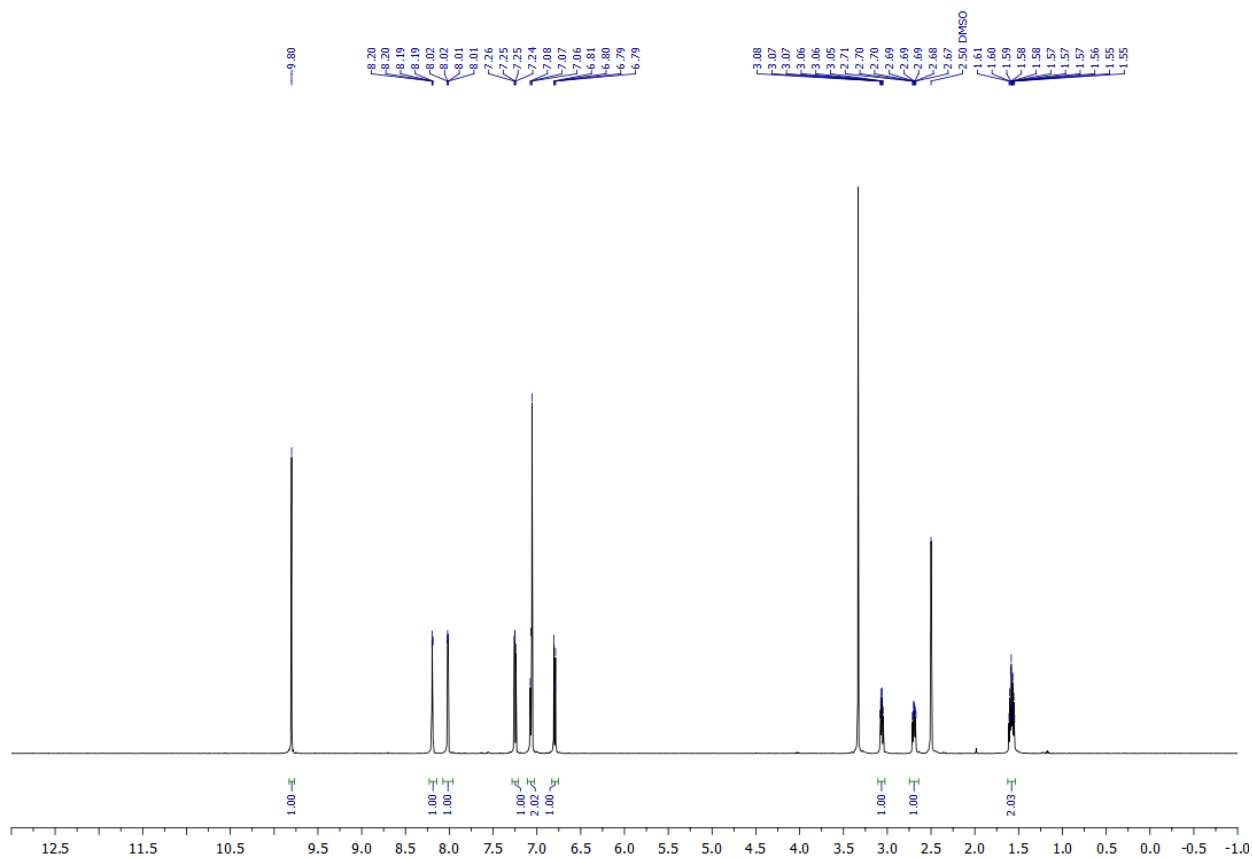

$^{13}\text{C}$  NMR (126 MHz,  $\text{CDCl}_3$ )

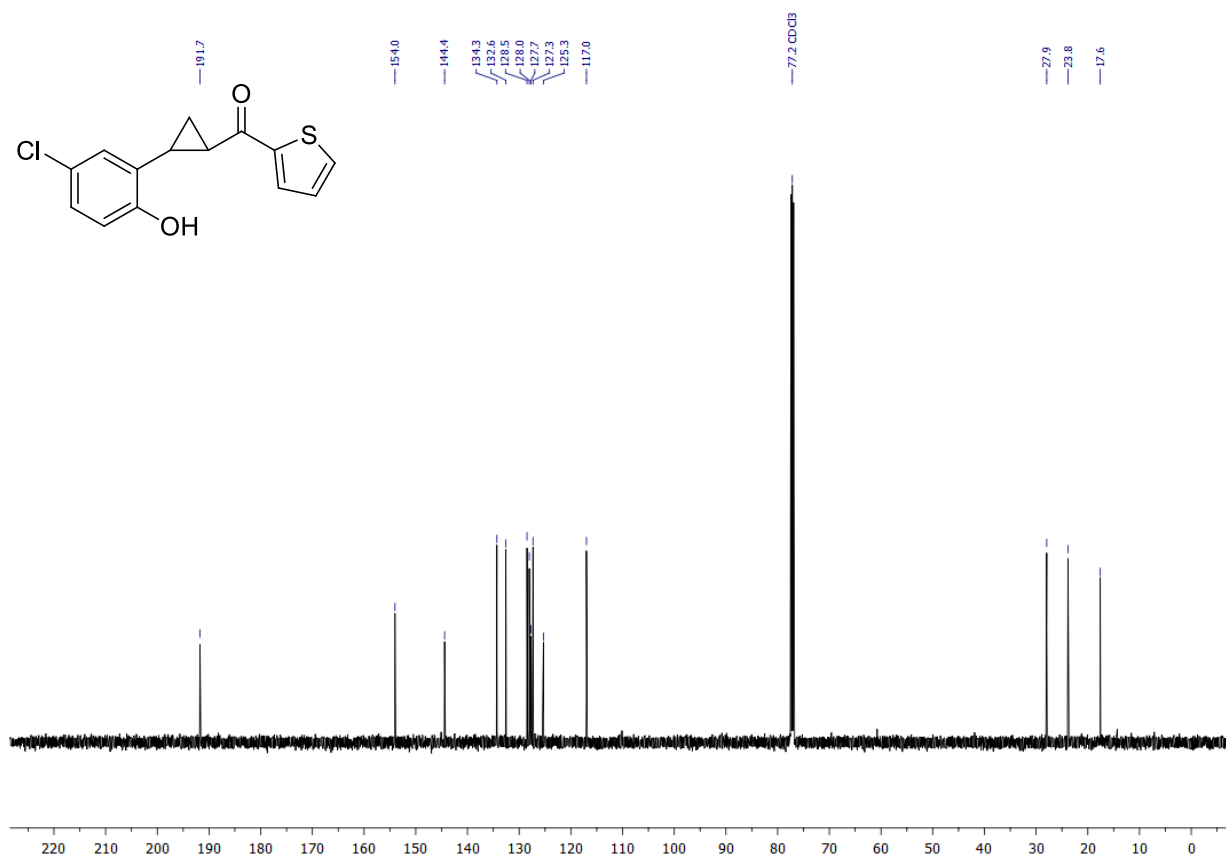

HSQC ( $^1\text{H}$  -  $^{13}\text{C}$ )

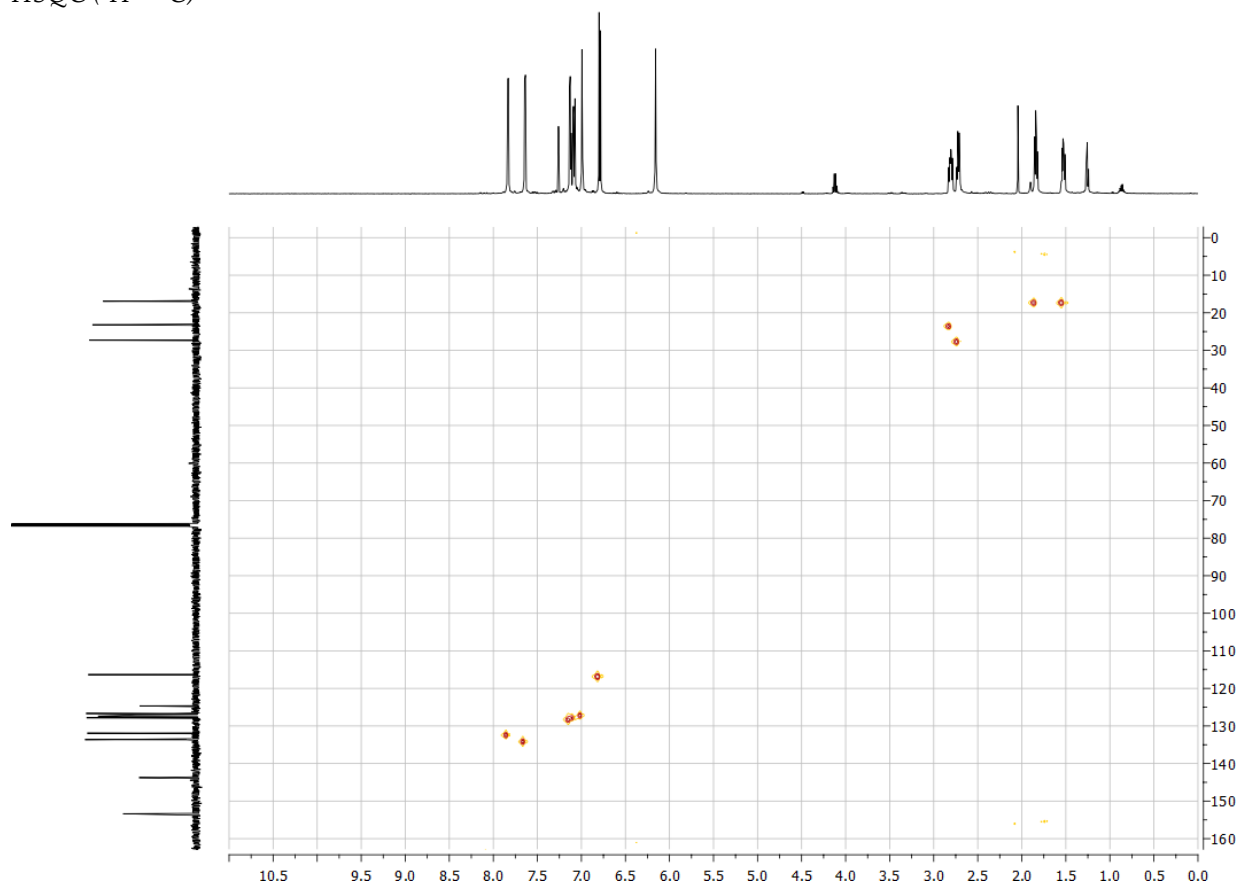

**[(1*R*,2*R*)-2-(5-Bromo-2-hydroxyphenyl)cyclopropyl](thiophen-2-yl)methanone (21)**

<sup>1</sup>H NMR (500 MHz, DMSO-d<sub>6</sub>)

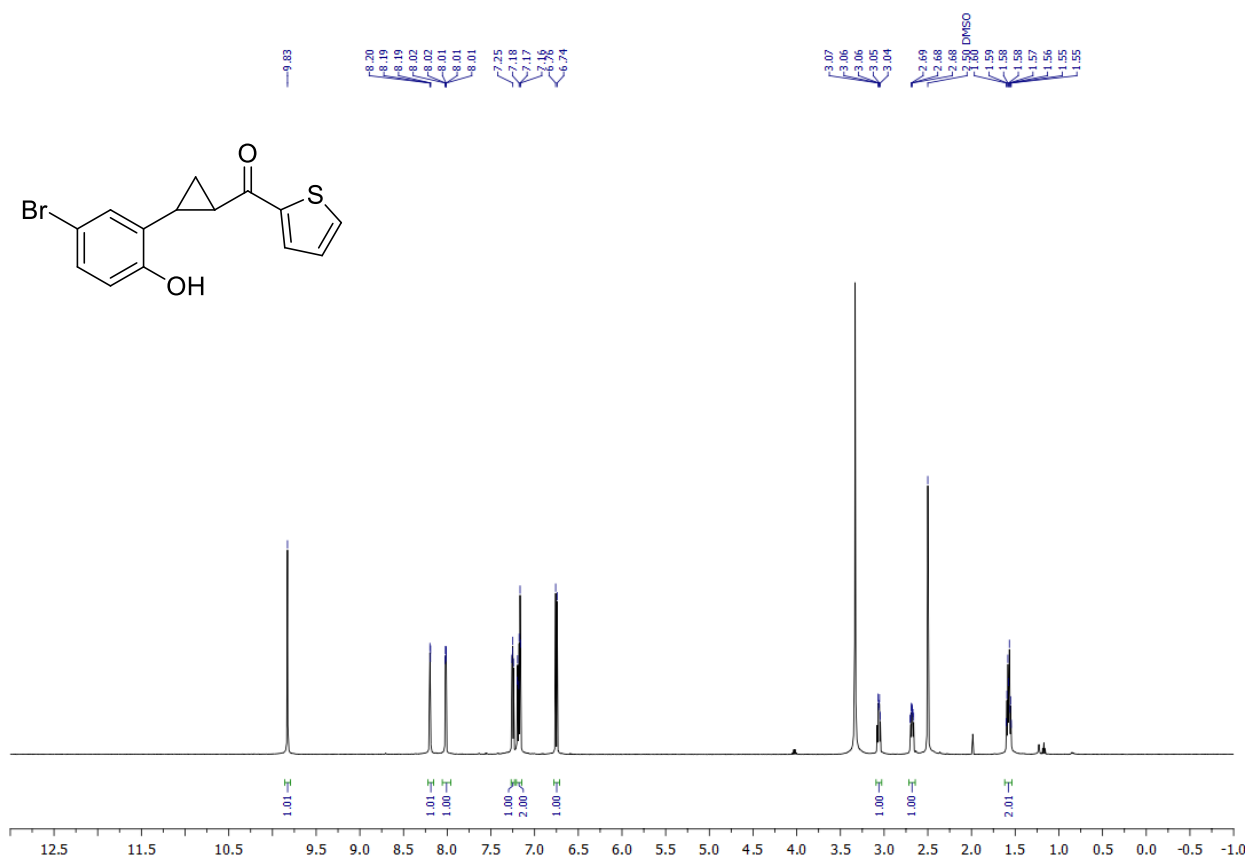

<sup>13</sup>C NMR (126 MHz, DMSO-d<sub>6</sub>)

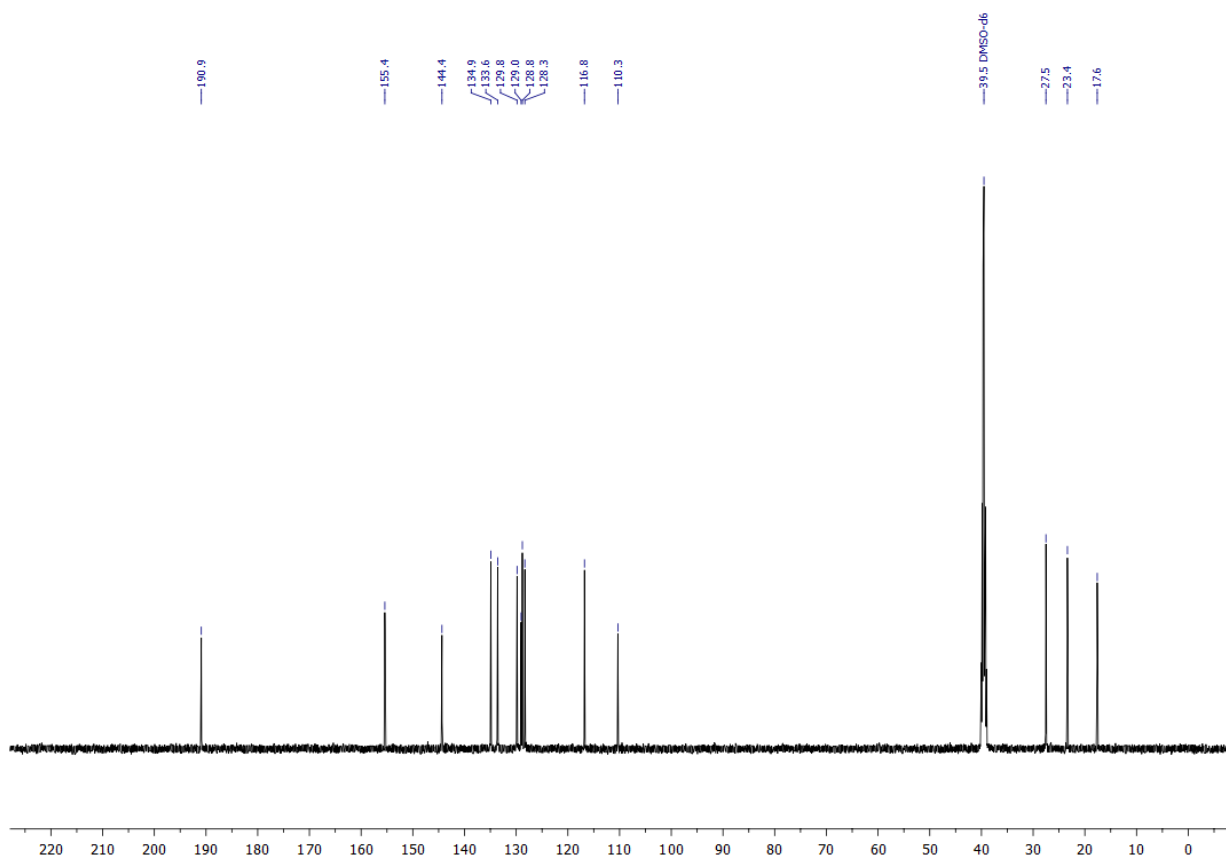

***[(1R,2R)-2-(2-Hydroxy-5-nitrophenyl)cyclopropyl](thiophen-2-yl)methanone (2m)***

$^1\text{H}$  NMR (500 MHz,  $\text{DMSO}-d_6$ )

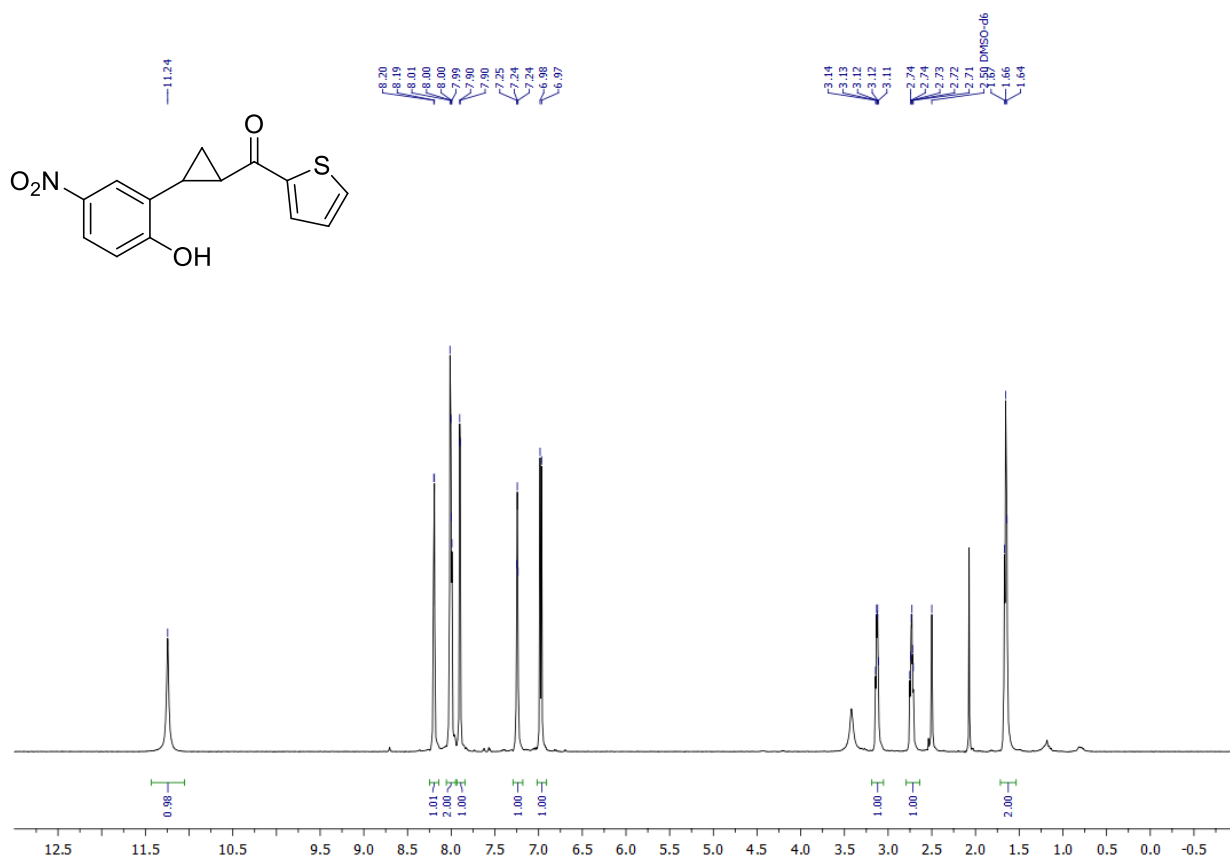

$^{13}\text{C}$  NMR (126 MHz,  $\text{DMSO}-d_6$ )

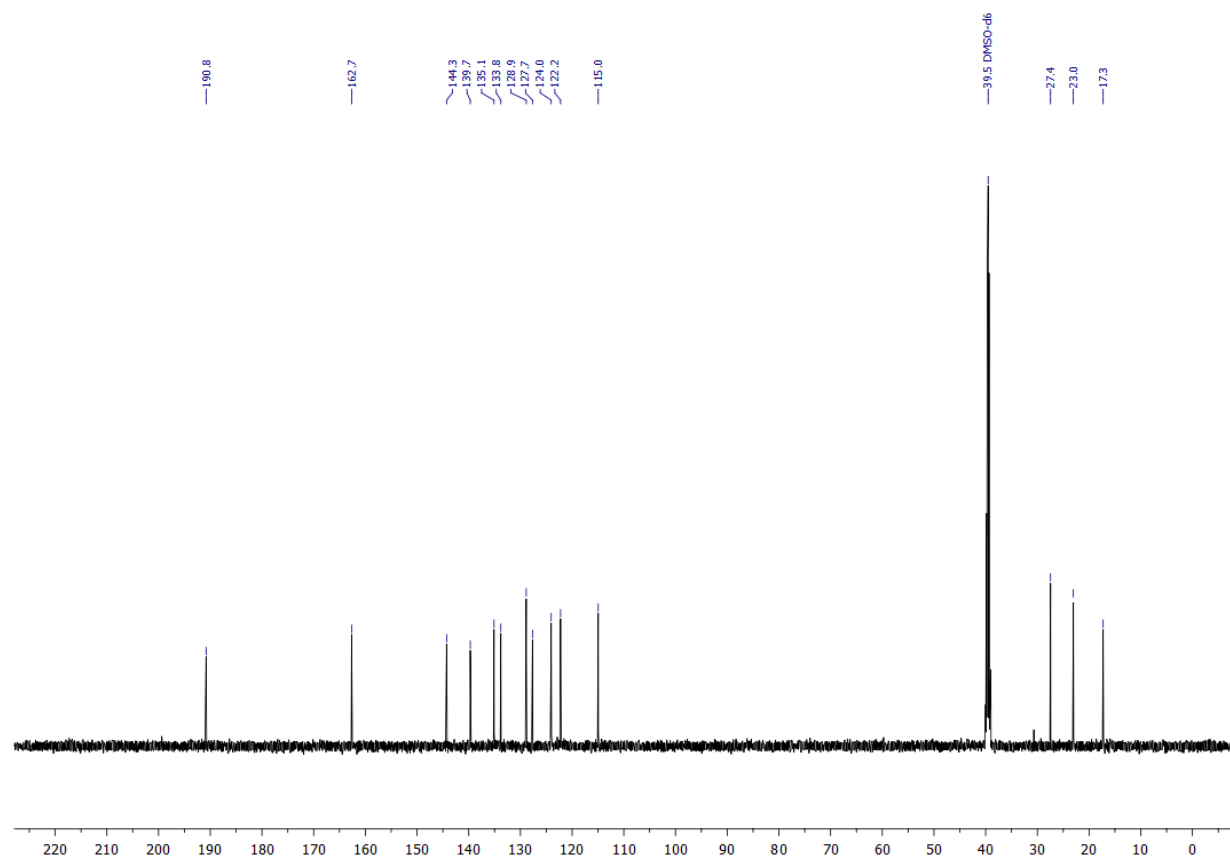

**[(1*RS*,2*RS*)-2-(2-Hydroxy-3-methoxyphenyl)cyclopropyl](phenyl)methanone (2n)**

<sup>1</sup>H NMR (500 MHz, CDCl<sub>3</sub>)

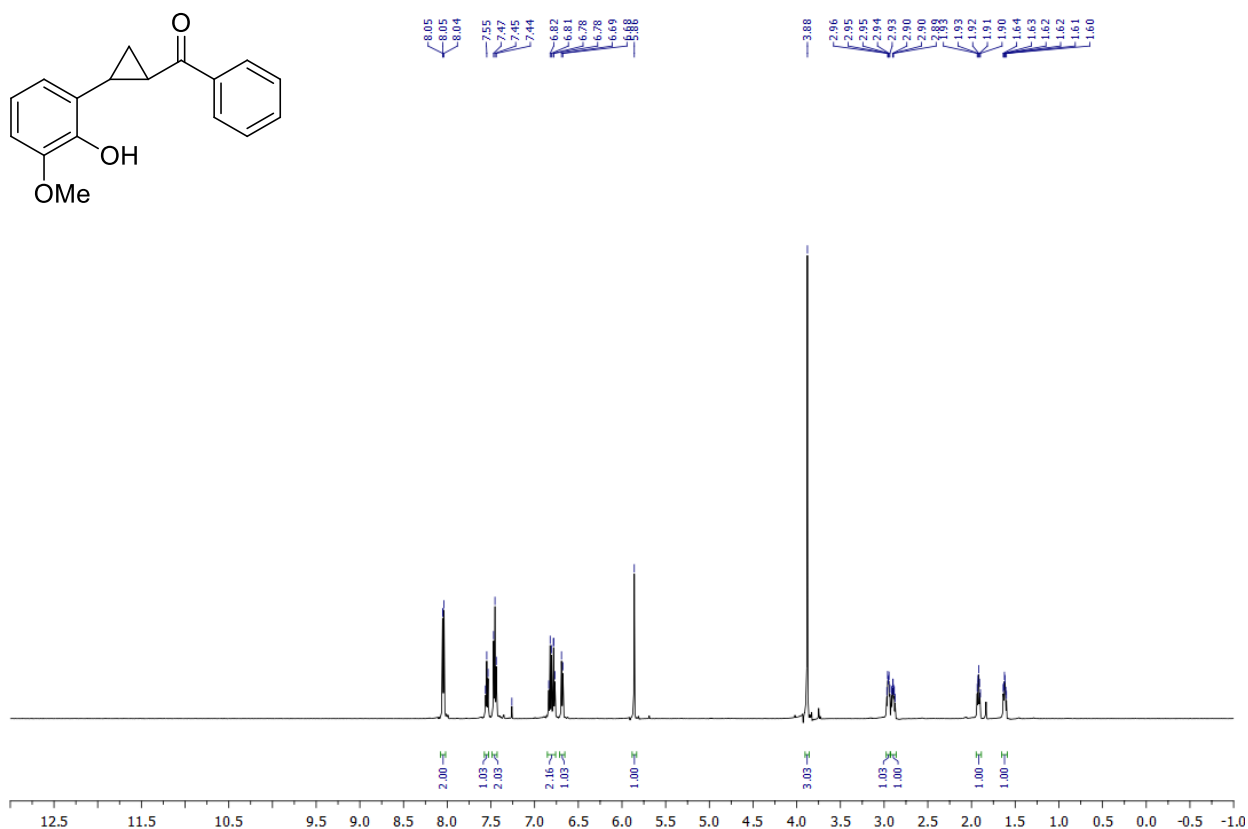

<sup>13</sup>C NMR (126 MHz, CDCl<sub>3</sub>)

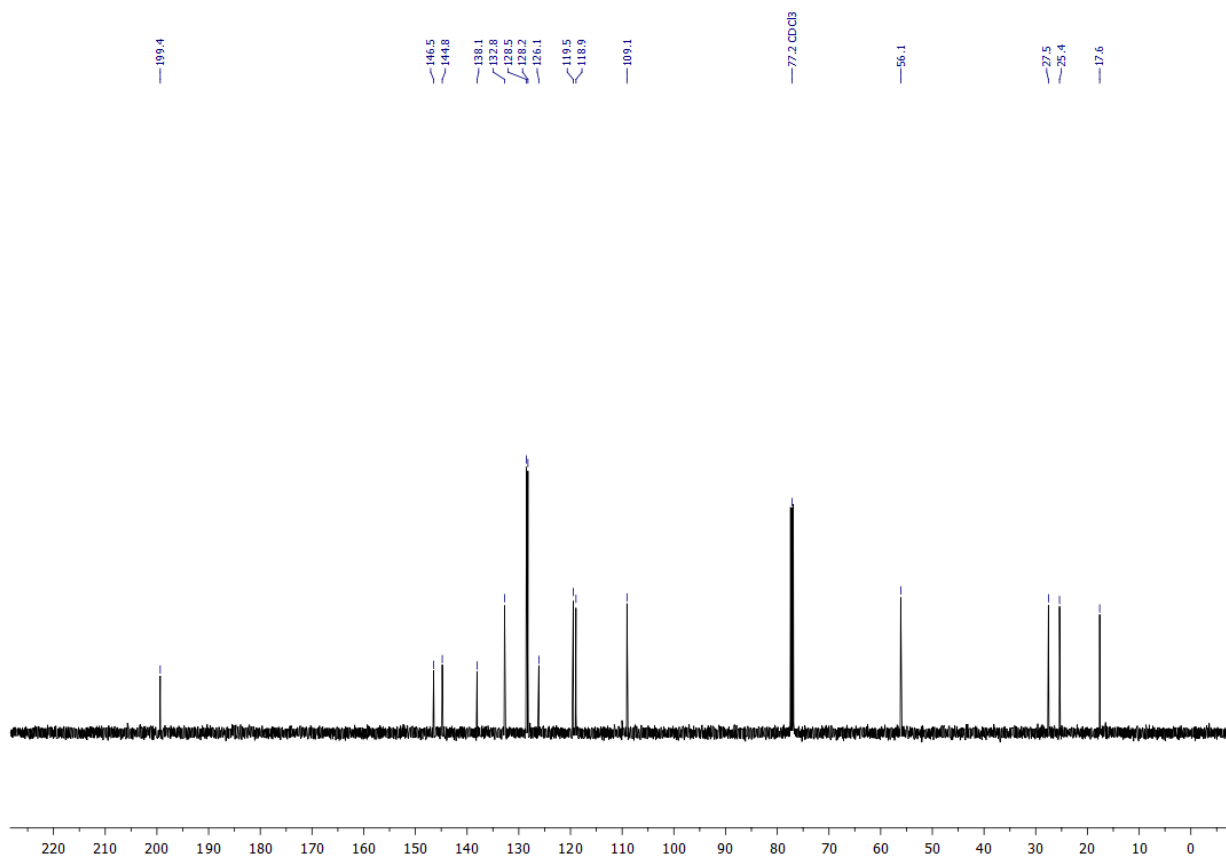



***[(1R,2R)-2-(3-Ethoxy-2-hydroxyphenyl)cyclopropyl](phenyl)methanone (2o)***

<sup>1</sup>H NMR (500 MHz, DMSO-*d*<sub>6</sub>)

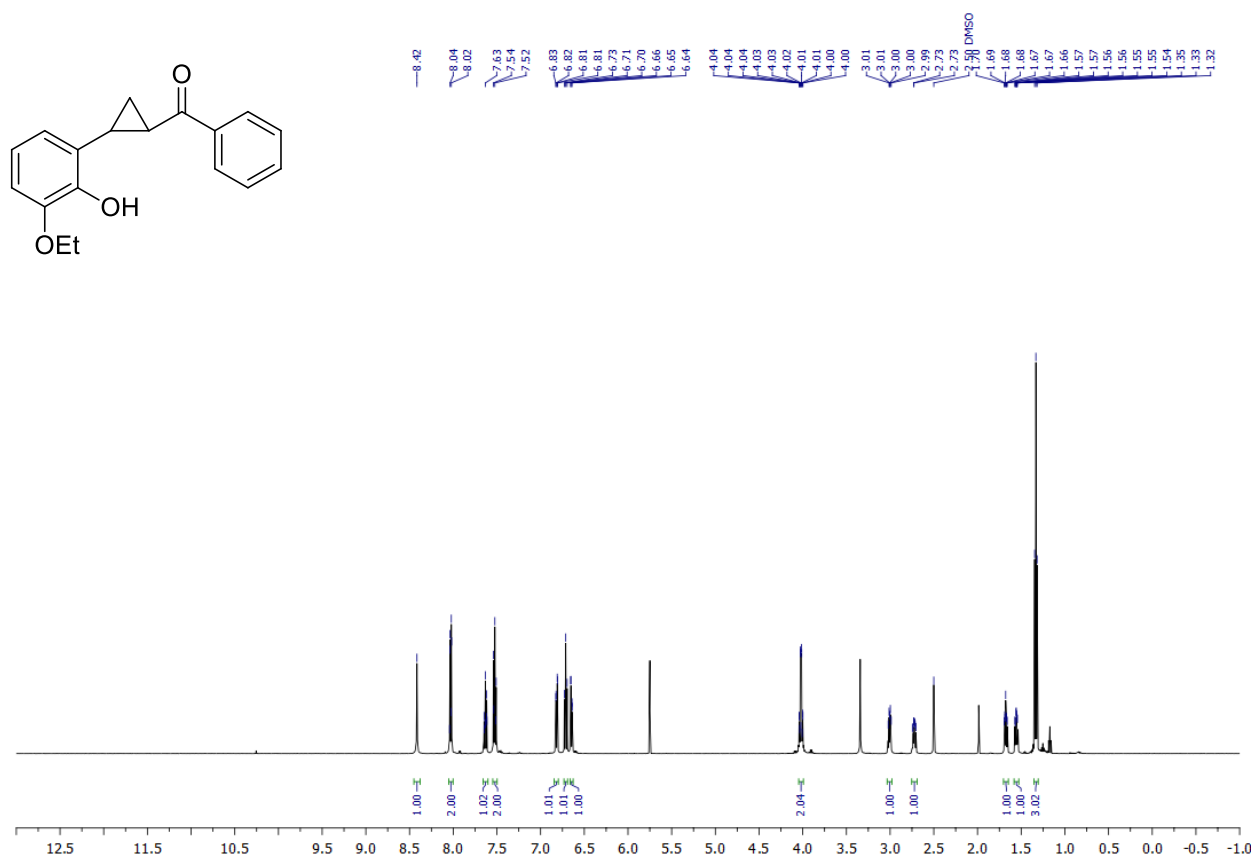

<sup>13</sup>C NMR (126 MHz, DMSO-*d*<sub>6</sub>)

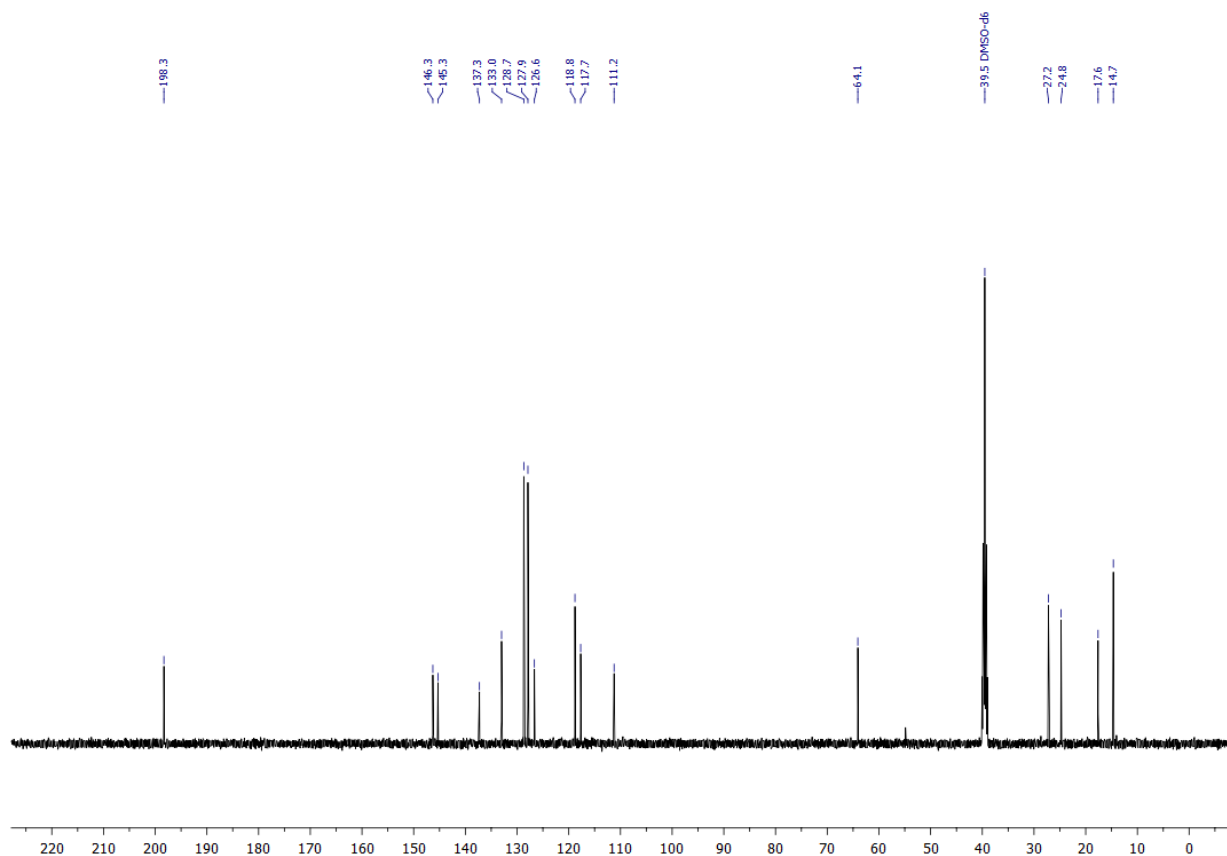

***[(1*R*,2*R*)-2-(3-Ethoxy-2-hydroxyphenyl)cyclopropyl](thiophen-2-yl)methanone (2p)***

<sup>1</sup>H NMR (500 MHz, DMSO-*d*<sub>6</sub>)

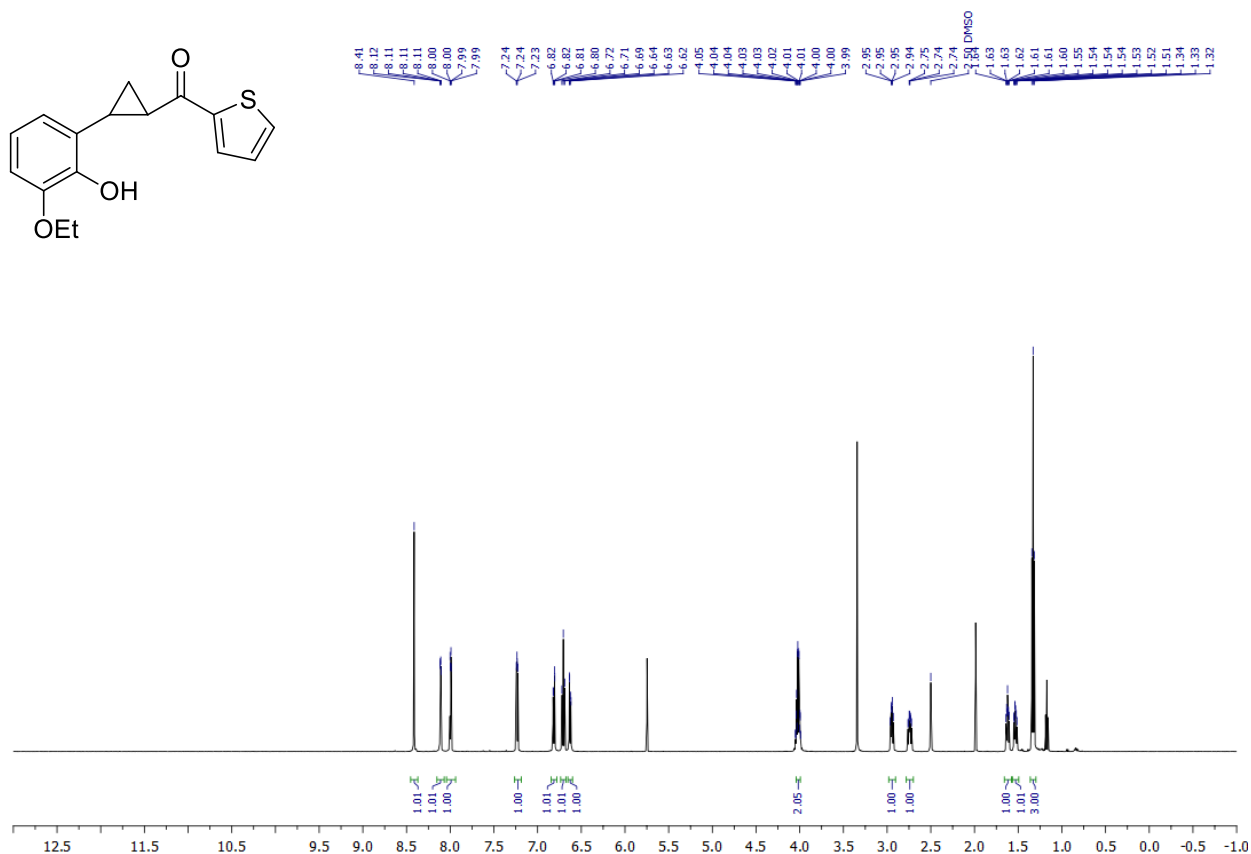

<sup>13</sup>C NMR (126 MHz, DMSO-*d*<sub>6</sub>)

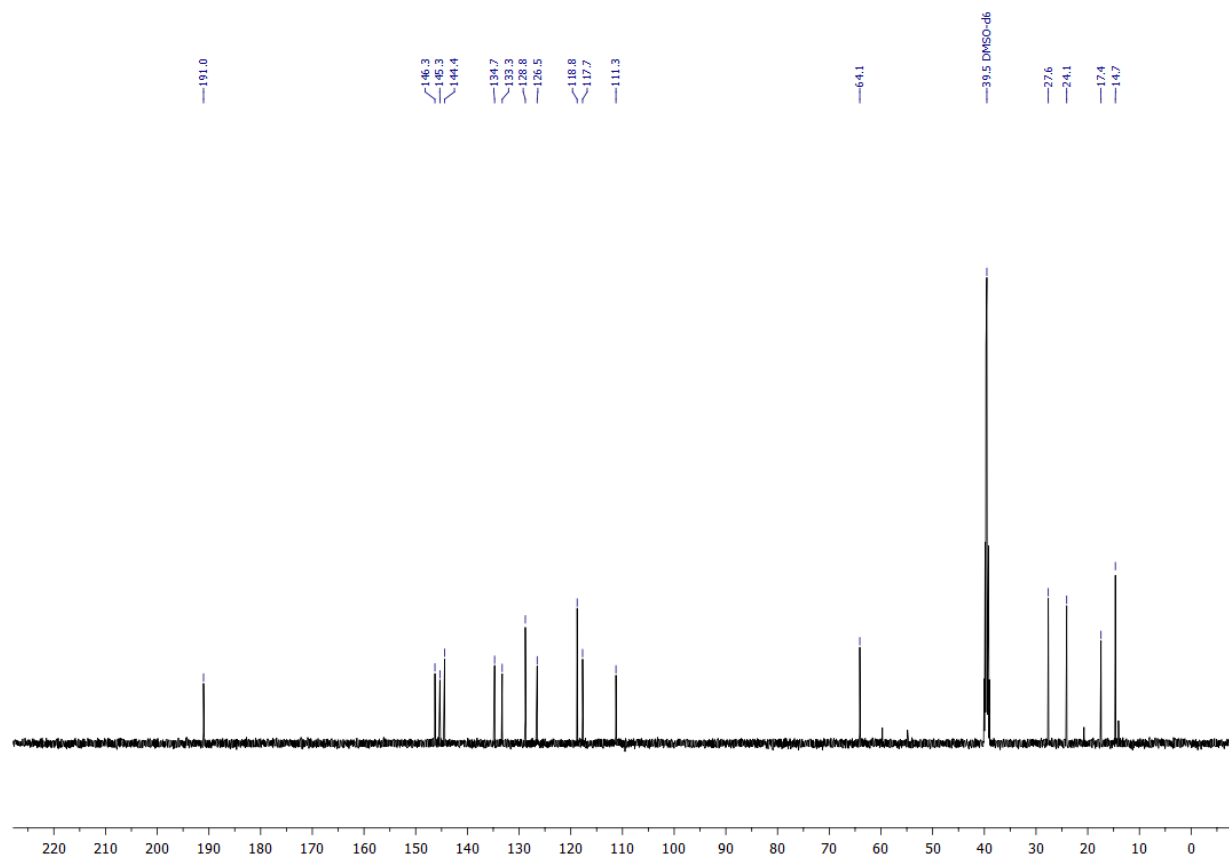

Supplement: s1 [file s1]
